# Plankton energy flows using a global size-structured and trait-based model

Gabriela Negrete-García<sup>a,e</sup>, Jessica Y. Luo<sup>b,c,e</sup>, Matthew C. Long<sup>b</sup>, Keith Lindsay<sup>b</sup>, Michael Levy<sup>b</sup>, Andrew D. Barton<sup>a,d</sup>

<sup>a</sup>*Scripps Institute of Oceanography, University of California San Diego, La Jolla, CA*

<sup>b</sup>*Climate & Global Dynamics Laboratory, National Center for Atmospheric Research, Boulder, CO*

<sup>c</sup>*Geophysical Fluid Dynamics Laboratory, National Oceanic and Atmospheric Administration, Princeton NJ*

<sup>d</sup>*Section of Ecology, Behavior and Evolution, University of California, San Diego, CA, USA*

<sup>e</sup>*These authors contributed equally to the manuscript*

---

## Abstract

Plankton community models are critical tools for understanding the processes that shape marine plankton communities, how plankton communities impact biogeochemical cycles, and the feedbacks between community structure and function. Here, using the flexible Marine Biogeochemistry Library (MARBL), we present the Size-based Plankton Ecological TRAits (MARBL-SPECTRA) model, which is designed to represent a diverse plankton community while remaining computationally tractable. MARBL-SPECTRA is composed of nine phytoplankton and six zooplankton size classes represented using allometric scaling relationships for physiological traits and interactions within multiple functional types. MARBL-SPECTRA is embedded within the global ocean component of the Community Earth System Model (CESM) and simulates large-scale, emergent patterns in phytoplankton growth limitation, plankton phenology, plankton generation time, and trophic transfer efficiency. The model qualitatively reproduces observed global patterns of surface nutrients, chlorophyll biomass, net primary production, and the biogeographies of a range of plankton size classes. In addition, the model simulates how predator:prey dynamics and trophic efficiency vary across gradients

---

*Email addresses:* [g1negret@ucsd.edu](mailto:g1negret@ucsd.edu) (Gabriela Negrete-García),  
[jessica.luo@noaa.gov](mailto:jessica.luo@noaa.gov) (Jessica Y. Luo)

in total ecosystem productivity. Shorter food chains that export proportionally more carbon from the surface to the ocean interior occur in productive regions, whereas in oligotrophic regions, the food chains are relatively long and export less organic matter from the surface. The union of functional type modelling with size-resolved, trait-based modelling approaches allows MARBL-SPECTRA to capture both large-scale elemental cycles and the structure of planktonic food webs affecting trophic transfer efficiency.

*Keywords:* plankton communities, trait-based models, phytoplankton, zooplankton, Earth system modelling

---

## 1. Introduction

Phytoplankton account for roughly half of the annual net primary productivity on Earth (Field et al., 1998), and marine net primary production is a fundamental constraint on total ecosystem production in the ocean. Phytoplankton are an extremely diverse set of microorganisms, ranging broadly in cell volume, cell morphology, and biogeochemical functions. The structure of plankton communities is shaped by variable physical, chemical, and predatory environments (Margalef, 1978). Marine plankton communities play key roles in biogeochemical cycling, which includes the export of carbon to the deep ocean (Henson et al., 2012) and the transfer of energy and organic matter to higher trophic levels (Ryther, 1969). Plankton community composition is important in regulating the efficiency of nutrient utilization and the character and quantity of exported organic matter on a regional and seasonal basis (Tréguer et al., 2018; Stemmann and Boss, 2012). Mechanistic representations of the distribution of plankton diversity, biogeography, and phenology over the global ocean are essential to predict the function of oceanic ecosystems and global biogeochemical cycles.

Coupled physical-biogeochemical models have long been used to better understand the processes that shape phytoplankton communities in the ocean. Historically, many marine plankton community models were constructed from a common nutrient-phytoplankton-zooplankton-detritus (NPZD) structure (Evans and Parslow, 1985; Fasham et al., 1990; Franks, 2002). Although these models ignore substantial biological complexity, when coupled to ocean circulation models, they provided large-scale estimates of biologically-mediated carbon fluxes (Six and Maier-Reimer, 1996). Modern day 'intermediate complexity' marine ecosystem models (Stock et al., 2014a; Moore

27 et al., 2004b, 2013b; Aumont et al., 2015; Yool et al., 2013) coupled into  
28 Earth system models have been successful at simulating large-scale biogeo-  
29 graphical variation in the efficiency of the biological pump and climate effects.  
30 Some have exhibited predictive capabilities for fisheries within Large Marine  
31 Ecosystems (Park et al., 2019) essential to sustain marine resources subject  
32 to climate-driven fluctuations and change. These marine ecosystem models  
33 typically include a minimum number of plankton functional types adequate  
34 for simulating broad plankton biogeography and biogeochemical interactions  
35 such as variations in export efficiency. However, they lack sufficient ecological  
36 resolution in the form of size-based differentiation within each plankton func-  
37 tional type to simulate the great diversity and complex interactions within  
38 plankton communities that are important to represent changes in community  
39 structure under climate change.

40 Trait-based models are a promising approach for increasing model diver-  
41 sity and ecological realism (Ward et al., 2012; Bruggeman and Kooijman,  
42 2007; Follows et al., 2007; Dutkiewicz et al., 2019). Instead of simulating a  
43 few species or generic types of plankton, trait-based models resolve a higher  
44 diversity of organisms with distinct physiological and interaction traits, as  
45 well as trade-offs between these traits (Litchman et al., 2007). Trait-based  
46 models have been used to study the mechanisms shaping plankton biogeog-  
47 raphy, size structure, and diversity (Barton et al., 2010; Ward et al., 2012;  
48 Banas, 2011; Acevedo-Trejos et al., 2015; Monteiro et al., 2011; Follows et al.,  
49 2007). However, due to their higher complexity and greater computational  
50 cost, trait-based models are more difficult to embed in general circulation  
51 models (GCM) and implement in climate-timescale simulations.

52 Here we describe a new size-structured modelling framework, called MARBL-  
53 SPECTRA, that leverages advances in trait-based modelling while remain-  
54 ing computationally tractable within coupled climate simulations. Using the  
55 Marine Biogeochemistry Library (MARBL) (Long et al., 2021), a config-  
56 urable ocean biogeochemical model that has been coupled to the Commu-  
57 nity Earth System Model (CESM), we implement the Size-based Plankton  
58 Ecological TRAits (SPECTRA) model, leveraging MARBL’s capacity for  
59 flexible ecosystem configuration. SPECTRA builds on the MARBL-CESM  
60 version 2.1 default ecosystem by expanding the number of groups within each  
61 phytoplankton and zooplankton functional type, using allometric scaling re-  
62 lationships to reduce the number of free parameters. MARBL-SPECTRA  
63 harmonizes the strengths of plankton functional type model representations  
64 crucial for capturing large-scale biogeochemical cycles, with the strengths

65 of trait-based models aimed at representing the richness of plankton food  
66 webs and associated trophodynamics, under the constraint that it must be  
67 lean enough to be run for century-scale simulations. MARBL-SPECTRA in-  
68 cludes nine phytoplankton groups belonging to four different plankton func-  
69 tional types (picoplankton, mixed phytoplankton, diatoms, and diazotrophs).  
70 It also includes six zooplankton groups divided into two microzooplankton  
71 ( $<200 \mu\text{m}$  ESD) and four mesozooplankton size classes (between 0.2 mm and  
72 20 mm). MARBL-SPECTRA allows us to better and more explicitly sim-  
73 ulate plankton diversity while remaining computationally tractable to not  
74 preclude climate-timescale integrations within a global model. The model  
75 simulates important marine ecosystem dynamics such as phenology, biogeog-  
76 raphy, and trophic dynamics, as well as the coupled cycles of carbon, nitro-  
77 gen, phosphorous, iron, silicon, and oxygen.

78 Here, we describe the features and assumptions of MARBL-SPECTRA  
79 and use the model to explore large-scale, emergent patterns in phytoplank-  
80 ton growth limitation, plankton phenology, plankton generation time, and  
81 trophic dynamics. The model results were validated against a comprehen-  
82 sive suite of biogeochemical observations, as well as independent estimates of  
83 phytoplankton and zooplankton productivity to assess MARBL-SPECTRA's  
84 ability to capture global-scale patterns in the transfer of energy through the  
85 planktonic food web. The model qualitatively reproduces observed global  
86 patterns of surface nutrients and chlorophyll biomass and is consistent with  
87 empirical estimates of global primary production and phytoplankton size  
88 distributions. We use the expansion of plankton communities in MARBL-  
89 SPECTRA to explore growth limitation patterns between functional groups  
90 and size classes of phytoplankton. It also provides a venue to understand phe-  
91 nology and the trophic position of the plankton community, showing clear  
92 differences across productive and unproductive regions of the ocean. Us-  
93 ing this model, we investigate mechanisms driving global patterns as well as  
94 regional differences in seasonal succession, generation time, and trophic scal-  
95 ing. These processes influence the rate of primary production, export, and  
96 transfer efficiency to higher trophic levels which are important in regulating  
97 the strength of the biological pump.

## 98 2. Methods

### 99 2.1. Size-based Plankton Ecological TRAits (SPECTRA) Model

100 The Size-based Plankton Ecological TRAits (SPECTRA) planktonic com-  
101 munity model is implemented using the Marine Biogeochemistry Library  
102 (MARBL) (Long et al., 2021), which is the ocean biogeochemical component  
103 within the Community Earth System Model (CESM). MARBL is designed  
104 to allow for a flexible number of plankton functional types, and in its de-  
105 fault configuration, invokes an updated version of the marine ecosystem of  
106 its predecessor, the Biogeochemistry Elemental Cycle (BEC) model (Moore  
107 et al., 2001, 2004b, 2013b). MARBL-SPECTRA is a new configuration of  
108 MARBL that resolves nine phytoplankton (Fig. 1) ranging in size from 0.47  
109  $\mu\text{m}$  to 300  $\mu\text{m}$  in equivalent spherical diameter (ESD; (Fig. 1)). The nine  
110 model phytoplankton include one picoplankton, one diazotroph, three sizes  
111 of diatoms, and four sizes of mixed phytoplankton. Size classes were chosen  
112 such that: 1) within each phytoplankton group, characteristic size (geometric  
113 mean of the size range) was evenly spaced on a  $\log_{10}$  scale, and 2) size classes  
114 across functional types were overlapping but not identical. The picoplankton  
115 group is analogous to *Prochlorococcus* and *Synechococcus* with a characteris-  
116 tic size of 0.89  $\mu\text{m}$  ESD. Diazotrophs fix nitrogen and have a characteristic  
117 size of 6.2  $\mu\text{m}$  ESD. Diatoms, the silicifiers in the community, range in size  
118 between 20  $\mu\text{m}$  to 200  $\mu\text{m}$  ESD. The mixed phytoplankton size ranges from  
119 1.7  $\mu\text{m}$  to 300  $\mu\text{m}$  ESD, and represent solitary protists not included in the  
120 other functional groups, such as picoeukaryotes and autotrophic dinoflagel-  
121 lates. Within the mixed phytoplankton group, implicit calcifiers (including  
122 coccolithophores) are represented by size classes between 3  $\mu\text{m}$  and 25  $\mu\text{m}$   
123 to encompass the main species of coccolithophores (e.g., *Emiliana huxleyi*)  
124 (Aloisi, 2015). Phytoplankton ESD was converted to carbon biomass accord-  
125 ing to carbon:biovolume (C:BV) relationships, for picoplankton (Bertilsson  
126 et al., 2003), small nanoplankton (Reynolds, 2006), diatoms, and other non-  
127 diatom phytoplankton (Menden-Deuer and Lessard, 2000). The traits and  
128 parameters for each model phytoplankton are determined by their body size  
129 and functional group, which we describe in greater detail below.

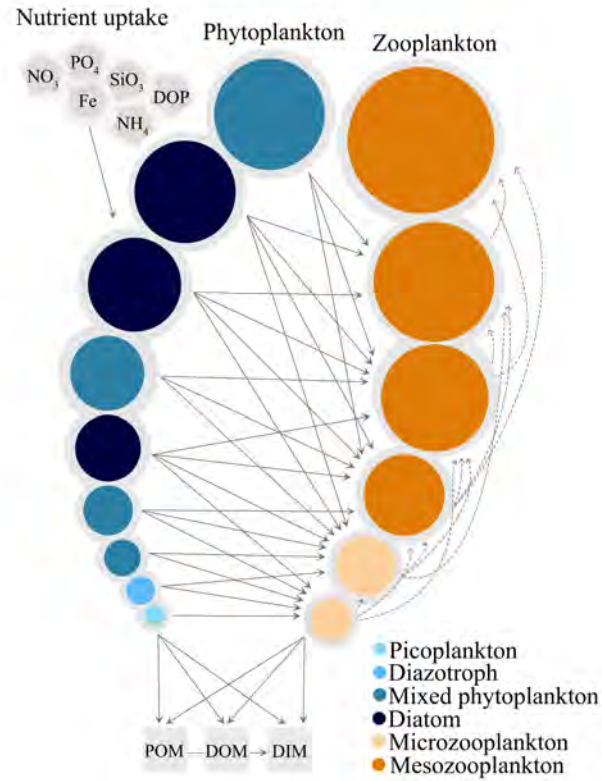

Figure 1: Schematic representation of MARBL-SPECTRA Model. The plankton community is composed of nine phytoplankton groups belonging to four different functional types; picoplankton (light blue), diazotrophs (sky blue), mixed phytoplankton (medium blue), and diatoms (dark blue), and six zooplankton groups composed of microzooplankton (light orange), and mesozooplankton (bright orange). Inorganic nutrients are taken up by phytoplankton ( $\text{SiO}_3$  is only taken up by diatoms) who are grazed by zooplankton. Larger circles indicate larger organisms, but the circles are not to scale. Straight arrows indicate phytoplankton consumption by zooplankton, while dotted arrows indicate zooplankton consumption by zooplankton. Mortality and aggregation transfer living organic material into sinking particulate and dissolved organic detritus. The fluxes to particulate organic matter (POM), dissolved organic matter (DOM), and dissolved inorganic matter (DIM) pools are shown as arrows from phytoplankton and zooplankton groups.

130 MARBL-SPECTRA includes six zooplankton ranging in size from 20  $\mu\text{m}$   
131 to 20 mm ESD (Fig. 1), with each zooplankton consuming multiple phyto-  
132 plankton and zooplankton prey types. The smallest two zooplankton ( $<200$   
133  $\mu\text{m}$  ESD) are heterotrophic organisms commonly referred to as microzoo-  
134 plankton. The smallest microzooplankton consumes only small phytoplank-  
135 ton, whereas the larger microzooplankton consumes both, small phytoplank-  
136 ton groups and the smallest microzooplankton. Mesozooplankton (between  
137 0.2 mm and 20 mm) correspond to the largest four zooplankton size classes  
138 (zoo3-zoo6) and include a range of organisms such as copepods, krill, chaetog-  
139 naths, and some gelatinous zooplankton. The first three mesozooplankton  
140 size classes are omnivorous, able to consume a range of phytoplankton and  
141 zooplankton prey, while the largest mesozooplankton is carnivorous, ranging  
142 from 6.3 to 20 mm in size. These feeding relationships between predators  
143 and prey are depicted by the feeding preference coefficient with an predator-  
144 to-prey optimal size ratio of 12.5:1 and maximum and minimum of 50:1 and  
145 1:1, respectively 2.4 (Law et al., 2009; Fuchs and Franks, 2010; Taniguchi  
146 et al., 2014; Heneghan et al., 2020). Notably excluded from the mesozoo-  
147 plankton are gelatinous zooplankton like salps and pyrosomes with extremely  
148 wide predator-to-prey size ratios (e.g., between 10,000:1 and 50:1) (Conley  
149 et al., 2018). Zooplankton ESD was converted to carbon biomass using mi-  
150 crozooplankton values from Menden-Deuer and Lessard (2000) and general  
151 non-gelatinous mesozooplankton values from Pitt et al. (2013).

152 MARBL-SPECTRA leverages MARBL’s flexible ecosystem configura-  
153 tion, which represents phytoplankton types  $P_i$  and grazers  $Z_j$ , where  $P_i$   
154 ( $\text{mmol C m}^{-3}$ ) is the phytoplankton biomass of the of the  $i^{\text{th}}$  phytoplankton  
155 type, and  $Z_j$  ( $\text{mmol C m}^{-3}$ ) is the zooplankton biomass of the  $j^{\text{th}}$  zooplank-  
156 ton type. The rate of change of biomass for the  $i^{\text{th}}$  phytoplankton is a balance  
157 of growth and losses to grazing (predation), mortality, and aggregation, in  
158 addition to physical transport processes not shown here. Key model symbols  
159 and units are summarized in Tables 1, 2, and 3. See Long et al. (2021) for a  
160 comprehensive presentation of the plankton community in CESM, version 2.

$$\frac{\partial P_i}{\partial t} = \text{growth} - \text{predation}_p - \text{loss}_p \quad (1)$$

161 Phytoplankton growth ( $\text{mmol C m}^{-3} \text{ d}^{-1}$ ) is determined by a carbon-  
162 specific, light-saturated photosynthesis rate  $PC_i^m$  ( $\text{d}^{-1}$ ) for each phytoplank-  
163 ton group, modulated by a non-dimensional factor which reflects sensitivities  
164 to light ( $\gamma_i^I$ ):

$$growth = PC_i^m \gamma_i^I P_i \quad (2)$$

165 The light sensitivity of growth rate ( $\gamma_i^I$ ) is parameterized using a modified  
 166 form of the Geider et al. (1997, 1998) dynamic growth model (Eq. 3), where  
 167  $\alpha_i^{Chl}$  ( $\text{mmol C m}^2 (\text{mg Chl W d})^{-1}$ ) is the Chl-specific initial slope of the  
 168 photosynthesis irradiance curve,  $I$  ( $\text{W m}^{-2}$ ) is the instantaneous irradiance,  
 169 and  $\theta_i^C$  is the *Chl*:C ratio ( $\text{mg Chl mmol C}^{-1}$ ), as follows:

$$\gamma_i^I = 1 - e^{-\frac{\alpha_i^{Chl} \theta_i^C I}{PC_i^m}} \quad (3)$$

170 MARBL also uses a multi-column subgrid scale treatment for light, fol-  
 171 lowing Long et al. (2015), which reduces biases when light fields are hetero-  
 172 geneous, such as high latitude spring bloom conditions. The above equation  
 173 describes the biomass-specific rate of photosynthesis as a saturating function  
 174 of irradiance.  $PC_i^m$  is expressed as a function of the reference carbon-specific  
 175 photosynthesis rate ( $PC_i^{ref}$ ) ( $\text{d}^{-1}$ ) (the maximum achievable carbon-specific  
 176 photosynthesis rate at the reference temperature) for each phytoplankton  
 177 group, the temperature dependence function ( $\gamma_i^T$ ), and the nutrient limita-  
 178 tion function ( $\gamma_i^N$ ) for each phytoplankton type.  $\alpha_i^{Chl}$ ,  $\theta_i^C$  and  $PC_i^{ref}$  are  
 179 set according to allometric relationships defined by Edwards et al. (2015a),  
 180 Geider et al. (1997) and (Marañón et al., 2013) explained in more detail in  
 181 Section 2.2.

$$PC_i^m = PC_i^{ref} \gamma_i^T \gamma_i^N \quad (4)$$

182 Nutrient limitation of growth ( $\gamma_i^N$ ) is determined by the most limiting nu-  
 183 trient resource ( $\text{mmol m}^{-3}$ ) for that phytoplankton, computed using Liebig’s  
 184 Law of the Minimum:

$$\gamma_i^N = \min(N_{N,i}^{lim}, N_{P,i}^{lim}, N_{Fe,i}^{lim}, N_{Si,i}^{lim}) \quad (5)$$

185 where the nutrients considered are nitrogen, iron, silicate, and phospho-  
 186 rous, yet not all nutrients are required for each phytoplankton group. Di-  
 187 atoms require nitrogen, phosphorous, silicate, and iron. Picoplankton, the  
 188 mixed phytoplankton group and diazotrophs do not assimilate silicate, and  
 189 diazotrophs are not limited by nitrogen due to their nitrogen fixing abili-  
 190 ties. Simultaneous limitation by multiple nitrogen forms, i.e., nitrate ( $\text{NO}_3$ )  
 191 and ammonium ( $\text{NH}_4$ ), is represented following the substitutable model of  
 192 O’Neill et al. (1989); See Long et al. (2021) for more details. A similar



193 approach is used to compute limitation terms for phosphate ( $\text{PO}_4$ ) and semi-  
194 liable dissolved organic phosphate (DOP). The effect on growth rate of each of  
195 these nutrients for each phytoplankton is represented according to Michaelis-  
196 Menten kinetics:

$$N_i^{lim} = \frac{N}{N + k_i} \quad (6)$$

197 where,  $k_i$  ( $\text{mmol N m}^{-3}$ ) represents the half-saturation nutrient concen-  
198 tration for each phytoplankton type  $i$  set according to allometric relationships  
199 defined by Edwards et al. (2012) explained in more detail in Section 2.2.4.

200 In contrast to the default MARBL configuration, which uses the Eppley  
201 (Eppley, 1972) temperature scaling with the  $Q_{10}$  factor, here, the tempera-  
202 ture modulation of growth for each phytoplankton ( $\gamma_i^T$ ) is represented by the  
203 Arrhenius-Van't Hoff equation (Arrhenius, 1915). Kremer et al. (2017) found  
204 that the Arrhenius-Van't Hoff temperature scaling function more closely  
205 matched observations of how phytoplankton growth rates scale with temper-  
206 ature. Here, the temperature modulation of phytoplankton rates is expressed  
207 relative to the metabolic rate at a reference temperature.

$$\gamma_i^T = e^{\left(\frac{-Ea(T_0 - T)}{kT_0T}\right)} \quad (7)$$

208 where,  $Ea$  is the activation energy (eV),  $k$  is the Boltzmann's constant  
209 ( $k = 8.617 \times 10^{-5} \text{ eV K}^{-1}$ ),  $T$  is temperature ( $^\circ\text{K}$ ), and  $T_0$  represents the  
210 reference temperature in the model ( $293.15^\circ\text{K}$ ).  $Ea$  for all phytoplankton is  
211 set to 0.32 eV (Kremer et al., 2017), except for picoplankton, where  $Ea^{pp}$   
212 is set to 0.42 eV, a value derived from an analysis of the Kremer et al. (2017)  
213 dataset. Multiple studies have shown that picoplankton have a higher tem-  
214 perature sensitivity compared to phytoplankton of larger sizes (Chen et al.,  
215 2014; Stawiarski et al., 2016; Anderson et al., 2021), and model experimen-  
216 tation showed that lower  $Ea$  is key for excluding picoplankton from polar  
217 regions, compared to lower temperature sensitivity of larger sizes.

218 Predation on phytoplankton ( $\text{predation}_p$ ;  $\text{mmol C m}^{-3} \text{ d}^{-1}$ ) is modeled  
219 using a Holling type II function, where predation pressure increases approx-  
220 imately linearly as prey increases, before saturating to a maximum rate at  
221 high prey concentrations:

$$\text{predation}_p = \iota_j^{max} \gamma_j^T \phi \left( \frac{P'_i}{P'_i + K^P} \right) Z_j \quad (8)$$

222 Here,  $\iota_j^{max}$  ( $\text{d}^{-1}$ ) is the zooplankton maximum ingestion rate at a reference  
223 temperature, and scales with zooplankton size (Section 2.3.1). The temper-  
224 ature modulation of ingestion for each zooplankton ( $\gamma_j^T$ ) is similar to that of  
225 phytoplankton, but differs by having a greater zooplankton activation energy  
226 ( $Ea^Z$ ) compared to autotrophs (Allen et al., 2005), as Rubisco carboxylation  
227 (rate limiting for photosynthesis) has a lower  $Ea$  than ATP synthesis (Allen  
228 et al., 2005; Ángel López-Urrutia et al., 2006). Thus, for zooplankton,  $Ea^Z$   
229 are set to 0.55 eV, a value similar to Ángel López-Urrutia et al. (2006) obser-  
230 vations. This is in contrast with the default version of MARBL, which uses  
231 the same temperature sensitivity for both phytoplankton and zooplankton  
232 processes. Among global ocean biogeochemical models, very few models use  
233 a higher temperature sensitivity for zooplankton vs. phytoplankton (e.g.,  
234 PISCES Aumont et al., 2015); the majority of models use either the same  
235 scaling for all plankton (e.g., COBALT Stock et al., 2014b, 2020), or no  
236 temperature scaling of zooplankton rates (e.g., MEDUSA Yool et al., 2013).  
237 Using a higher temperature sensitivity in zooplankton vs. phytoplankton  
238 may have implications for phytoplankton-zooplankton coupling and trophic  
239 transfer, particularly under climate change, however, a systematic study has  
240 not yet been done.

$$\gamma_j^T = e^{\left(\frac{-Ea^Z(T_0 - T)}{kT_0T}\right)} \quad (9)$$

241  $K^P$  ( $\text{mmol C m}^{-3}$ ) is the half-saturation prey concentration which regu-  
242 lates ingestion efficiency at low prey concentrations, and is set as a constant  
243 value for all zooplankton (Section 2.3.1).  $\phi$  (unitless) is the feeding preference  
244 coefficient, which describes the probability of a given predator ingesting prey  
245 of a particular size. The feeding preference coefficient will be discussed in  
246 greater detail in Section 2.4.  $P_i'$  is the phytoplankton concentration in excess  
247 of a temperature- and depth-dependent refuge, and is used to limit autotroph  
248 mortality at low biomass ( $\text{mmol C m}^{-3}$ ) (Long et al., 2021).

249 Phytoplankton loss ( $\text{loss}_p$ ;  $\text{mmol C m}^{-3} \text{d}^{-1}$ ) is represented by a linear  
250 loss term ( $m_i$ ) ( $\text{d}^{-1}$ ) that includes non-predation mortality and a collection  
251 of density-independent processes such as dissolved organic matter (DOM)  
252 exudation, viral lysis, and cell death. 6% of phytoplankton loss is routed  
253 to dissolved organic carbon (DOC) and the remaining 94% to the dissolved  
254 inorganic carbon (DIC). In MARBL-SPECTRA, instead of a single allometric  
255 scaling, linear mortality is set as a fraction of  $PC_i^{ref}$ , with a factor of 0.02 for  
256 diatoms and 0.03 for all other phytoplankton. The lower linear mortality for

257 diatoms provide a slight advantage over other phytoplankton, particularly in  
 258 nutrient rich (upwelling and polar) regions:

$$loss_p = m_i P'_i \gamma_i^T + A(P'_i) \quad (10)$$

259  $A(P'_i)$  (mmol C m<sup>-3</sup> d<sup>-1</sup>) represents loss of phytoplankton due to aggre-  
 260 gation and unresolved predation, and this loss goes directly to particulate  
 261 organic matter (POC).

$$A(P'_i) = a_i (P'_i)^2 \quad (11)$$

262  $A(P'_i)$  is parameterized by a "quadratic mortality" rate,  $a_i$  (d<sup>-1</sup> mmol  
 263 C<sup>-1</sup> m<sup>3</sup>) for all phytoplankton that falls between imposed minimum ( $a_i^{min}$   
 264  $P'_i$ ) and maximum aggregation ( $a_i^{max} P'_i$ ) rates.

265 As with phytoplankton, the time rate of change in zooplankton is a bal-  
 266 ance between growth and losses to predation and non-predation mortality:

$$\frac{\partial Z_j}{\partial t} = \zeta ingestion - predation_z - loss_z \quad (12)$$

267 Zooplankton ingestion (mmol C m<sup>-3</sup> d<sup>-1</sup>) represents the predation gains  
 268 by zooplankton from their prey, and  $\zeta$  (*unitless*) represents the maximum  
 269 gross growth efficiency coefficient (i.e., the maximum fraction of ingestion  
 270 that goes to growth; Straile, 1997), and is set to be 30% for all zooplankton.  
 271 Zooplankton ( $Z_j$ ) are able to feed on both phytoplankton ( $P_i$ ) and other  
 272 zooplankton ( $Z_k$ , this excludes the largest zooplankton), modulated by a  
 273 feeding preference coefficient ( $\phi$ ). Ingestion is thus the total consumption for  
 274 a zooplankton ( $Z_j$ ):

$$ingestion = l_j^{max} \gamma_j^T Z_j \phi \left( \left( \frac{P'_i}{P'_i + K^P} \right) + \left( \frac{Z'_k}{Z'_k + K^P} \right) \right) \quad (13)$$

275 where  $Z'_k$  is the zooplankton concentration in excess of a temperature-  
 276 and depth-dependent threshold, used to limit zooplankton mortality at low  
 277 biomass (mmol C m<sup>-3</sup>).  $\gamma_j^T$ ,  $l_j^{max}$ ,  $K^P$ , and  $\phi$  are described above.

278 Of the total zooplankton ingestion, 35% is egested, yielding an assimi-  
 279 lation efficiency (AE) of 65%, which is within the general range of 60-80% used  
 280 for zooplankton (Carlotti et al., 2000). Partitioning of the egestion into the  
 281 POC, DOC, and DIC fractions depends on zooplankton size, and is discussed  
 282 further in Section 2.4.1. Active respiration is 35% of ingestion, with the re-  
 283 maining biomass-based (basal) respiration represented by the linear fraction

Table 1: Size-independent biological parameters.

| Parameter                                | Symbol     | Value | Units                                         |
|------------------------------------------|------------|-------|-----------------------------------------------|
| Phytoplankton activation energy          | $Ea$       | 0.32  | $eV$                                          |
| Picoplankton activation energy           | $Ea^{PP}$  | 0.42  | $eV$                                          |
| Zooplankton activation energy            | $Ea^Z$     | 0.55  | $eV$                                          |
| Phytoplankton "quadratic mortality" rate | $a_i$      | 0.035 | $\text{mmol C}^{-1} \text{m}^3 \text{d}^{-1}$ |
| Phytoplankton linear mortality scaling   | $m_i$      | 0.03  | $\text{d}^{-1}$                               |
| Diatom linear mortality scaling          | $m_{diat}$ | 0.02  | $\text{d}^{-1}$                               |
| Grazing half-saturation coefficient      | $K^P$      | 1.1   | $\text{mmol m}^{-3}$                          |

284 of zooplankton loss ( $\text{mmol C m}^{-3} \text{d}^{-1}$ ). Thus, zooplankton production be-  
 285 comes:

$$production = \zeta ingestion - m_j(Z'_j)\gamma_j^T \quad (14)$$

286 where  $m_j$  is the basal respiration rate ( $\text{d}^{-1}$ ), and is set following allometric  
 287 relationships, as discussed in Section 2.4.1 (see also Table 3).

288 Except for the largest mesozooplankton, all other zooplankton are also  
 289 predated upon by larger zooplankton. These predator-prey relationships are  
 290 displayed in Fig. 1. The predation term ( $predation_z$ ;  $\text{mmol C m}^{-3} \text{d}^{-1}$ ) thus  
 291 represents the predation losses from one zooplankton ( $Z_k$ ) to another ( $Z_j$ ):

$$predation_z = \nu_j^{max} \gamma_j^T \phi \left( \frac{Z'_k}{Z'_k + K^P} \right) Z_j \quad (15)$$

292 Zooplankton losses ( $loss_z$ ;  $\text{mmol C m}^{-3} \text{d}^{-1}$ ) consist of a linear loss  
 293 term representing zooplankton mortality, as well as unresolved losses to  
 294 higher trophic levels (Steele and Henderson, 1992), which are represented by a  
 295 biomass- and temperature-dependent quadratic mortality term  $a_j$  ( $\text{m}^3 \text{mmol}$   
 296  $\text{C}^{-1} \text{d}^{-1}$ ). The largest mesozooplankton size class has a higher quadratic loss  
 297 mortality to compensate for higher trophic grazing not directly represented  
 298 by grazing from the modeled ecosystem. Total non-predation losses include  
 299 the linear (basal metabolic rate) and quadratic losses:

$$loss_z = m_j \gamma_j^T Z'_j + a_j \gamma_j^T (Z'_j)^2 \quad (16)$$

300 *2.2. Allometric scaling of phytoplankton traits*

301 Many phytoplankton traits, such as metabolic rate and nutrient affinity,  
302 are related to cell size (Chisholm, 1992; Litchman et al., 2007; Edwards et al.,  
303 2012). There are also ecologically meaningful differences in key traits across  
304 phytoplankton functional groups. For example, large diatoms tend to grow  
305 more slowly than do smaller diatoms, but diatoms as a whole tend to grow  
306 more rapidly than other competing functional groups such as dinoflagellates  
307 (Litchman et al., 2007; Edwards et al., 2012). We use key trade-offs among  
308 functional traits to model community composition of marine phytoplank-  
309 ton along environmental gradients. For example, major functional traits in  
310 phytoplankton parameters such as nutrient-dependent growth and uptake  
311 have physiological trade-offs in the ability to acquire and utilize resources  
312 (Litchman et al., 2007). Incorporating these traits and trait trade-offs into  
313 a model allows it to represent the fundamental and realized ecological niche  
314 of a species and facilitates its representation across a range of environmental  
315 and biotic conditions (Ward et al., 2012; Follows et al., 2007). This approach  
316 has been used in a range of plankton community and biogeochemical mod-  
317 els (e.g. Fuchs and Franks, 2010; Ward et al., 2012; Taniguchi et al., 2014;  
318 Dutkiewicz et al., 2015a; Heneghan et al., 2020). MARBL-SPECTRA adopts  
319 this approach, and ties organismal traits and interactions to body size and  
320 functional group by employing allometric rules to distinguish within plank-  
321 ton groups instead of individually tuning each plankton functional type. The  
322 use of these allometric relationships substantially reduces the number of free  
323 parameters.

The effect of size variation on phytoplankton traits is often idealized using  
a series of power-law scaling function with the typical form:

$$t = \alpha V^\beta \quad (17)$$

324 where  $t$  is the physiological trait,  $V$  is the cell volume across plankton in  
325 the model,  $\alpha$  is a scaling constant, and  $\beta$  is an exponent describing the size  
326 dependence. Below, we describe important allometric traits in the model, and  
327 discuss how our choices of  $\alpha$  and  $\beta$  across functional groups were informed  
328 by empirical studies across many phytoplankton sizes and functional groups  
329 (Litchman et al., 2007; Edwards et al., 2012; Marañón et al., 2013). Model  
330 traits are summarized in Fig. 2 and Tables 1 and 2.

Table 2: Size-dependent phytoplankton biological parameters and scaling coefficients ( $\alpha V^\beta$ ), where  $V$  is volume of each phytoplankton,  $\alpha$  is a scaling constant, and  $\beta$  is an exponent describing the size dependence.

| Parameter                                            | Symbol           | Picoplankton |         | Mixed phytoplankton |         | Diatoms     |         | Diazotroph   |         | Units                                |
|------------------------------------------------------|------------------|--------------|---------|---------------------|---------|-------------|---------|--------------|---------|--------------------------------------|
|                                                      |                  | $\alpha$     | $\beta$ | $\alpha$            | $\beta$ | $\alpha$    | $\beta$ | $\alpha$     | $\beta$ |                                      |
| C-specific rate of photosynthesis                    | $PC_i^{ref}$     | 1.7          |         | 2.5                 | -0.14   | 5.4         | -0.14   | 1.8          |         | $d^{-1}$                             |
| Initial slope of the photosynthesis-irradiance curve | $\alpha_i^{chl}$ | 0.56         | -0.15   | 0.56                | -0.15   | 0.67        | -0.12   | 0.56         | -0.15   | $mmol\ C\ m^2\ (mg\ Chl\ W\ d)^{-1}$ |
| Chlorophyll to C ratio                               | $\theta_i^C$     | 0.12         |         | 0.28                | 0.026   | 0.28        | 0.026   | 0.28         | 0.026   | $mg\ Chl\ mmol\ C^{-1}$              |
| Half-saturation concentration $NO_3$                 | $K_{NO_3}$       | 0.22         | 0.30    | 0.22                | 0.30    | 0.20        | 0.30    | 2            |         | $mmol\ NO_3\ m^{-3}$                 |
| Half-saturation concentration $NH_4$                 | $K_{NH_4}$       | 0.020        | 0.30    | 0.020               | 0.30    | 0.020       | 0.30    | 0.20         |         | $mmol\ N\ m^{-3}$                    |
| Half-saturation concentration $PO_4$                 | $K_{PO_4}$       | 0.0060       | 0.30    | 0.0060              | 0.30    | 0.0060      | 0.30    | 0.006        | 0.30    | $mmol\ PO_4\ m^{-3}$                 |
| Half-saturation concentration $Fe$                   | $K_{Fe}$         | $0.60e^{-5}$ | 0.30    | $0.60e^{-5}$        | 0.30    | $0.6e^{-5}$ | 0.30    | $0.60e^{-5}$ | 0.30    | $mmol\ Fe\ m^{-3}$                   |
| Half-saturation concentration DOP                    | $K_{DOP}$        | 0.080        | 0.30    | 0.080               | 0.30    | 0.080       | 0.30    | 0.080        | 0.30    | $mmol\ DOP\ m^{-3}$                  |
| Half-saturation concentration $SiO_3$                | $K_{SiO_3}$      |              |         |                     |         | 0.035       |         |              |         | $mmol\ SiO_3\ m^{-3}$                |

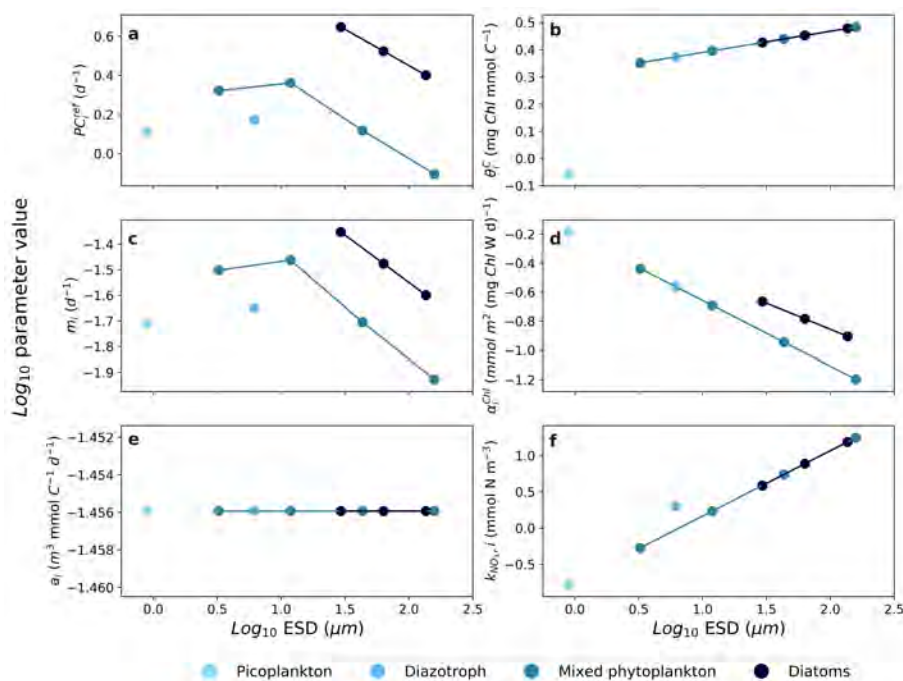

Figure 2: Model phytoplankton traits and parameters. Relationships for picoplankton (light blue), diazotrophs (sky blue), mixed phytoplankton (medium blue), and diatoms (dark blue), between equivalent spherical diameter (ESD) and (a) daily C-specific rate of photosynthesis ( $PC_i^{ref}$ ) at a reference temperature ( $20^\circ\text{C}$ ), (b) Linear mortality ( $m_i$ ), (c) aggregation loss ( $\alpha_i$ ) representing aggregation and unresolved predation, (d) maximum value of the Chl to phytoplankton carbon ratio ( $\theta_i^C$ ), (e) initial slope of photosynthesis-irradiance curve ( $\alpha_i^{Chl}$ ), and half saturation nitrate concentration ( $k_{NO_3}$ ).

### 331 2.2.1. Phytoplankton growth and photosynthesis

332 Within phytoplankton functional types and for cells larger than approx-  
 333 imately  $5 \mu\text{m}$  ESD, phytoplankton  $PC_i^{ref}$  rates generally decrease with increas-  
 334 ing cell size (Marañón et al., 2013; Edwards et al., 2012; Tang, 1995).  
 335 For phytoplankton smaller than  $5 \mu\text{m}$  ESD, larger cells grow faster than do  
 336 smaller ones, such that the overall relationship between  $PC_i^{ref}$  and cell size is  
 337 unimodal, with the fastest growth rates achieved for cells around  $5 \mu\text{m}$  ESD  
 338 (Marañón et al., 2013; Edwards et al., 2012; López-Sandoval et al., 2014).  
 339 In addition, different functional groups tend to deviate from this overall pat-  
 340 tern. Diatoms, for example, tend to grow faster than other groups (Edwards  
 341 et al., 2012).

342 Consistent with this overall paradigm,  $PC_i^{ref}$  rates in MARBL-SPECTRA

343 scale with cell volume and functional group with a scaling slope of -0.14  
344 (Marañón et al., 2013) within functional types (Fig. 2a). Diatoms have  
345 higher  $PC_i^{ref}$  rates than other groups, but within diatoms,  $PC_i^{ref}$  decreases  
346 with body size ranging from  $4.4 d^{-1}$  for the smallest diatoms, and  $2.5 d^{-1}$  for  
347 the largest diatom, consistent with observations from Marañón et al. (2013)  
348 and López-Sandoval et al. (2014). The high  $PC_i^{ref}$  rates of diatoms facili-  
349 tate their high biomass in nutrient-rich habitats and during bloom conditions  
350 (Margalef, 1978). Picoplankton have a low  $PC_i^{ref}$  rate of  $1.3 d^{-1}$  compared  
351 to quickly growing but somewhat larger cells. We have found that incorpo-  
352 rating lower  $PC_i^{ref}$  rates for picoplankton and mixed phytoplankton smaller  
353 than  $5 \mu\text{m}$  ESD was essential for controlling small phytoplankton growth.  
354 Otherwise, the picoplankton and smallest mixed phytoplankton dominate,  
355 particularly in the higher latitude seasonal seas.  $PC_i^{ref}$  rates for the sec-  
356 ond smallest mixed phytoplankton through the largest mixed phytoplankton  
357 ranged between  $2.3 d^{-1}$  and  $0.8 d^{-1}$ . Diazotrophs have  $PC_i^{ref}$  rates of  
358  $1.5 d^{-1}$ , roughly half compared with other phytoplankton of their size, due to  
359 the high energetic demands of nitrogen fixation, which reduces growth rates  
360 (Margalef, 1978; Fu et al., 2005; Falcón et al., 2005; Breitbarth et al., 2008).

### 361 2.2.2. Chlorophyll-carbon ratios

362 The chlorophyll to carbon ratio ( $\theta_i^C$ ) reflects photoacclimation and nu-  
363 trient stress and has been shown to track phytoplankton physiology both in  
364 the laboratory and in the field (Behrenfeld et al., 2005; Behrenfeld and Boss,  
365 2003). Under the dynamic growth parameterization (Geider et al., 1997),  
366 the carbon-specific photosynthesis rate is a function of irradiance as well as  
367  $\theta_i^C$ . Chl synthesis is regulated by the balance between light absorption and  
368 photosynthetic carbon fixation (Geider et al., 1998). Depending on this ra-  
369 tio, a fraction of newly assimilated nitrogen is diverted to the synthesis of  
370 Chl.  $\theta_i^C$  values vary greatly among species and are affected nonlinearly by  
371 ambient nutrients, light, and temperature (Geider et al., 1997; Behrenfeld  
372 et al., 2002).  $\theta_i^C$  is maximal at high temperatures and low irradiances un-  
373 der nutrient-replete conditions and declines at high irradiances, especially at  
374 low temperature and under nutrient limiting conditions (Geider et al., 1997).  
375 The maximum chlorophyll to carbon ratio ( $\theta_i^C$ ) is used as an input parameter  
376 in the model but is weakly constrained by empirical studies, with generally  
377 higher  $\theta_i^C$  values for large diatoms and lower values for picoplankton such  
378 as *Prochlorococcus* (Geider et al., 1997; Sathyendranath et al., 2009). We  
379 therefore used a single allometric scaling relationship for most of the phyto-



380 plankton, where  $\theta_i^C$  ranges from 0.025 - 0.035 [mg Chl mg  $C^{-1}$ ], except for  
381 picoplankton which have a  $\theta_i^C$  of 0.01 [mg Chl mg  $C^{-1}$ ] (Fig. 2b), to match  
382 with observed values (Hartmann et al., 2014; Li et al., 2010; Geider et al.,  
383 1998, 1986).

### 384 2.2.3. Initial slope of the photosynthesis-irradiance curve

385 Phytoplankton growth rates generally increase under increasing light up  
386 to an irradiance optima, at which point growth rates peak before declining  
387 due to photoinhibition at higher irradiance levels (Falkowski et al., 1985).  
388 These patterns can be illustrated by the photosynthesis-irradiance (P-I) curve,  
389 described by the initial slope of the P-I curve ( $\alpha_i^{Chl}$ ) and the biomass-specific  
390 rate of photosynthesis ( $PC_i^m$ ) under optimal irradiance (Eq. 3). Variations  
391 in  $\alpha_i^{Chl}$  across phytoplankton can be explained in part by consistent differ-  
392 ences between major taxonomic groups (Richardson et al., 1983; Cullen and  
393 MacIntyre, 1998; MacIntyre, 1998; Boyd et al., 2010) as well as cells of dif-  
394 fering size (Geider et al., 1986; Finkel, 2001). Where, a decrease in  $\alpha_i^{Chl}$   
395 with cell size represents the ability of smaller cells to outperform larger cells  
396 under low-light conditions (Edwards et al., 2015a). This is consistent with  
397 self-shading of intercellular photosynthetic pigments, also referred to as the  
398 "Package effect" (Kirk, 1976), where as cell size increases, the same concen-  
399 tration of pigment, cellular volume, or unit of biomass will adsorb less light  
400 due to self-shading of pigment molecules (Kirk, 1994).

401 Discrepancies across functional types exist, with higher  $\alpha_i^{Chl}$  in diatoms  
402 compared to other phytoplankton of similar sizes, due to the ability of di-  
403 atoms to perform relatively well under both limiting light and excessive light  
404 (Richardson et al., 1983), or fluctuating light (Litchman, 1998) environments.  
405 Based upon the dataset of Edwards et al. (2015b), we set  $\alpha$ , and  $\beta$  to be 0.67  
406 mmol C m<sup>2</sup> (mg Chl W d)<sup>-1</sup> and -0.12 for diatoms (Table 4 & Fig. 2d). For  
407 other groups, we used 0.56 mmol C m<sup>2</sup> (mg Chl W d)<sup>-1</sup> and -0.15 respec-  
408 tively.

### 409 2.2.4. Nutrient acquisition

410 Phytoplankton growth in MARBL is a multiplicative factor of tempera-  
411 ture, light, and nutrient limitation, with the nutrient limitation set by what-  
412 ever nutrient concentration is lowest relative to the half-saturation constants  
413 for nutrient uptake (Moore et al., 2004b; Long et al., 2021). Experimen-  
414 tal data and theoretical evidence demonstrates that smaller cells have higher  
415 rates of nutrient uptake per unit biomass and lower half-saturation constants

416 (Eppley et al., 1969; Aksnes and Egge, 1991) compared to larger cells. The  
417 observed  $\beta$  between  $k$  and cell volume falls between 0.24 and 0.45 for  $\text{NO}_3$ ,  
418 and 0.29 to 0.56 for  $\text{PO}_4$  (Edwards et al., 2012). Since our model includes  
419 multiple limiting nutrients, we used a single size-scaling exponent of 0.3 for  
420 all nutrients. This means that within groups, picoplankton have more effi-  
421 cient nutrient uptake (smallest  $k_N$ ) compared to the large diatoms and large  
422 mixed phytoplankton. Diazotrophs (e.g. *Trichodesmium* spp.) are the only  
423 exception from this allometric scaling, since they are less efficient at inor-  
424 ganic nutrient uptake (McCarthy and Carpenter, 1979) and they often occur  
425 as large colonies, where their surface to volume considerations imply higher  
426 half-saturation constants relative to the small phytoplankton and diatom  
427 groups (Letelier and Karl, 1998). However, higher half saturation constants  
428 for diazotrophs were only set for nitrogen and iron. See table 2 for all nutrient  
429 half-saturation constants and scaling coefficients.

430 MARBL-SPECTRA uses a fixed C:N:P stoichiometric ratio of nutrient  
431 uptake of 117:16:1 for all phytoplankton, which is a modified ratio following  
432 Anderson and Sarmiento (1994). While a dynamic model of C:P stoichiom-  
433 etry is provided within MARBL (Galbraith and Martiny, 2015; Long et al.,  
434 2021), enabling it with MARBL-SPECTRA would have added 15 additional  
435 tracers to the model, making computation extremely expensive. Addition-  
436 ally, we opted against using a size-dependent C:P stoichiometry (e.g., Finkel  
437 et al., 2010) to avoid undue complexity, as we found from initial tests that  
438 adding allometric C:P stoichiometry did not significantly impact plankton  
439 community composition in the present day. However, for future develop-  
440 ment of MARBL-SPECTRA, particularly for climate change experiments,  
441 size-dependent C:P stoichiometry can be explored.

442 Photoadaptation is calculated as a variable phytoplankton ratio of chloro-  
443 phyll to nitrogen based on Geider et al. (1998). The model allows for variable  
444 Fe/C and Si/C ratios with an optimum and minimum value prescribed. As  
445 ambient Fe (or Si for diatoms) concentrations decline the phytoplankton  
446 lower their cellular quotas. Phytoplankton N/P ratios are fixed at the Red-  
447 field value of 16, but the diazotroph group has a higher N/P atomic ratio of  
448 50 (see a detailed description of the model in Moore et al. (2001, 2004a)).  
449 Thus, community N/P uptake varies with the phytoplankton community  
450 composition.

451 *2.3. Zooplankton allometric scaling terms*

452 *2.3.1. Zooplankton Ingestion*

453 The vital rates of organisms depend on their size: ingestion, metabolism,  
454 and growth rates all increase with body size to a power of approximately  
455 0.75, typically such that the mass-specific rates decline with body mass to  
456 a power of near -0.25 (Peters and Wassenberg, 1983; Kiørboe and Hirst,  
457 2014; Hansen et al., 1997). In MARBL-SPECTRA, zooplankton are defined  
458 as heterotrophs that can consume phytoplankton, other zooplankton, or a  
459 combination of both. Zooplankton ingestion rates are calculated as a function  
460 of prey carbon concentrations using the Hollings type II (Michaelis-Menten)  
461 function. There are two free parameters, maximum ingestion rate ( $\iota_j^{max}$ ) and  
462 the half-saturation constant for grazing ( $K^P$ ).

463 Size-based variations in maximum specific ingestion rates were calculated  
464 as an allometric function of the predator biomass, with biomass-specific rates  
465 decreasing as biomass increases (Hansen et al., 1997).  $\iota_j^{max}$  are also modified  
466 by the feeding preference coefficient, which is a function of the ratio between  
467 the predator size and the prey size.  $K^P$  are highly variable and typically  
468 hard to constrain. Across all the zooplankton classes,  $K^P$  has been found to  
469 be independent of body size (Hansen et al., 1997). Therefore, the effective  
470  $K^P$  is set to 1.1 ( $\text{mmol C m}^{-3}$ ) across zooplankton types (table 3).

471 *2.4. Predator-prey relationships*

472 In addition to physiological rates, predation in marine ecosystems is size-  
473 specific, with larger prey eating a characteristic size range of smaller prey  
474 (Sheldon et al., 1977; Hansen et al., 1994; Cohen et al., 1993; Barnes et al.,  
475 2008). We model these trophic links using a feeding kernel (FK) that is  
476 further modified to give the feeding preference coefficient (eq. 8,  $\phi$ ). Feed-  
477 ing kernels constitute the probability of a given predator ingesting prey of a  
478 particular size and can be highly variable, reflecting a great deal of measure-  
479 ment uncertainty and biological variability, with various studies employing  
480 gaussian, Laplace, and log-normal distributions (Law et al., 2009; Fuchs and  
481 Franks, 2010; Taniguchi et al., 2014; Heneghan et al., 2020). Here, we use  
482 the feeding kernel as a starting point to determine predator-prey feeding  
483 relationships, which are subject to additional tuning to achieve plankton dis-  
484 tributions consistent with large-scale observational constraints. The feeding  
485 kernel  $FK_{Z_j}$  is represented as a complementary error function:

$$FK_{Z_j} = \text{Erfc} \left( \frac{\delta_{P_i, Z_j}}{\sqrt{2}\sigma_{Z_j}} \right) \quad (18)$$

486 where  $\text{Erfc}(x) = 1 - \text{Erf}(x)$ , the standard error function:

$$\text{Erf}(x) = \frac{2}{\sqrt{\pi}} \int_0^x \exp -t^2 dt \quad (19)$$

487 and is closely related to the cumulative distribution function of the stan-  
488 dard normal distribution.

489 Here, the numerator of the Erfc function is  $\delta_{P_i, Z_j}$ , which is the absolute  
490 value of the difference between the predator-prey size ratio and the optimal  
491 predator-prey size ratio for any given predator,  $Z_j$ :

$$\delta_{P_i, Z_j} = \left| \frac{ESD_{Z_j}}{ESD_{P_i}} - \text{Opt}_{Z_j} \right| \quad (20)$$

492 where  $ESD_{Z_j}$  and  $ESD_{P_i}$  refer to the ESD (in mm) of the predator  $Z_j$   
493 and its prey, respectively, and  $\text{Opt}_{Z_j}$  is the predator specific optimal predator-  
494 to-prey size ratio. Note that we have used the  $P_i$  subscript here for simplicity,  
495 but the prey of  $Z_j$  encompasses both phytoplankton and zooplankton prey.  
496  $\text{Opt}_{Z_j}$  varies from approximately 7.5 to 18 from the smallest to the largest  
497 zooplankton, and represents the phenomenon that the mean predator-to-prey  
498 size ratio will often increase as predator size increases (Hansen et al., 1994).  
499 The parameters that define  $\text{Opt}_{Z_j}$  are given in Table 3.

500 Similarly, the width of the feeding kernel also increases as predator size  
501 increases, reflecting both the wider organism size ranges, varied prey cap-  
502 ture strategies, and multiphagy of larger zooplankton (Hansen et al., 1994;  
503 Kiørboe, 2011). Here it is represented by  $\sigma_{Z_j}$ , which is in the denominator  
504 of eqn. 18, and is defined as  $\sigma_{Z_j} = 0.5 * \text{Opt}_{Z_j}$ .

505 The feeding kernel as defined by the complementary error function has the  
506 property of being exactly 1 when  $\delta_{P_i, Z_j} = 0$ , and then declines in a sigmoidal  
507 manner as the predator-to-prey ratio increasingly differs from the optimum.  
508 Put together over the whole range of predator-to-prey size ratios, the resul-  
509 tant curve increases to a point at the center (the optimum), and declines on  
510 either side (see Fig. 3f), resembling the Laplace (double exponential) distri-  
511 bution, which was used in Fuchs and Franks (2010). It is important to note  
512 here that the exact shape of the feeding kernel is secondary relative to the  
513 following adjustments to the predator-prey feeding preference coefficient, as

514 they allowed us to tune this highly sensitive but poorly constrained grazing  
515 term to achieve plankton distribution patterns consistent with large-scale  
516 observational constraints.

517 Building upon this basic kernel formulation, we made several adjustments  
518 to model predator prey interactions to improve the representation of the  
519 model plankton community. First, we increased microzooplankton grazing on  
520 picoplankton relative to the value in the feeding kernel. The increased grazing  
521 accounts for unresolved grazing by heterotrophic nanoflagellates, and allows  
522 for a higher stability in picoplankton populations. Second, we increased  
523 grazing on small diatoms, kept medium diatoms the same, and decreased  
524 the grazing on large diatoms. The increase in grazing on small diatoms was  
525 necessary to provide a strong top-down control on the abundance of fast  
526 growing small diatoms. The reduced grazing on larger diatoms accounts for  
527 their ability to form colonies and/or frustules to reduce losses to predation  
528 (Oostende et al., 2018). Third, zooplankton production rates were lower than  
529 estimated values (Landry and Calbet, 2004), so we decreased zooplankton  
530 grazing on other zooplankton to increase zooplankton production. Fourth, we  
531 also increased grazing on the small implicit calcifying mixed phytoplankton  
532 group to increase zooplankton production and at the same time reduce their  
533 high abundance in subpolar regions. Fifth, to increase mesozooplankton  
534 production, we decreased microzooplankton grazing on small diatoms, to  
535 allow mesozooplankton to take advantage of diatom blooms especially in  
536 very productive regions of the ocean.

537 To ensure ingestion does not exceed maximum ingestion for a particular  
538 predator, the feeding kernel values were normalized by predator, such that  
539 the sum of all feeding kernel values per predator equalled 1. The individual  
540 feeding kernel values per predator-prey pair then modified predator ingestion  
541 rates (eq. 8).

#### 542 *2.4.1. Zooplankton egestion, metabolism, and mortality*

543 Of the ingested prey carbon, 65% is assimilated into the predator biomass,  
544 and 35% is egested via sloppy feeding and fecal pellet production. The  
545 partitioning of the egestion into sinking particulate organic carbon (POC),  
546 semi-labile dissolved organic carbon (DOC), and highly labile DOC (which  
547 is instantly transformed to dissolved inorganic carbon, or DIC) varies by  
548 zooplankton size and phytoplankton prey type. The flux into sinking POC  
549 ( $\rho^{POC}$ ) increases with zooplankton size. However, there is no distinction in  
550 the sinking speed of detritus by size. We used the ballast model of Armstrong

Table 3: Size-dependent zooplankton biological parameters and scaling coefficients ( $t = \alpha V^\beta$ ).

| Parameter                      | Symbol      | Zooplankton |         | Units                             |
|--------------------------------|-------------|-------------|---------|-----------------------------------|
|                                |             | $\alpha$    | $\beta$ |                                   |
| Maximum ingestion rate         | $i_j^{max}$ | 4.3         | -0.63   | $d^{-1}$                          |
| Quadratic mortality            | $a_j$       | 0.21        | 0.58    | $m^3 \text{ mmol } C^{-1} d^{-1}$ |
| Zooplankton linear mortality   | $m_j$       | 0.11        | -0.63   | $d^{-1}$                          |
| Optimal predator to prey-ratio | $Opt_{Z_j}$ | 12.9        | 0.53    | unitless                          |

551 et al. (2002) to distinguish between sinking speeds for ballast minerals (sili-  
 552 cate, biogenic calcium carbonate ( $CaCO_3$ ), and mineral dust). The routing  
 553 of ingestion to POC ranges from 0% for microzooplankton feeding on pi-  
 554 coplankton to 35% for large mesozooplankton feeding on large diatoms. The  
 555 remainder of the egestion losses not going to POC are partitioned to DOC  
 556 ( $\rho^{DOC}$ ; 25%) and DIC ( $\rho^{DIC}$ ; 75%).

557 In MARBL-SPECTRA, we distinguish between zooplankton ingestion-  
 558 based (active) respiration and biomass-based (basal) respiration. Active res-  
 559 piration is a fixed fraction of ingestion (35%), but biomass-specific basal  
 560 respiration decreases with size (Kiørboe and Hirst, 2014). Similar to the  
 561 specific ingestion rate (Section 2.3.1), the biomass-specific linear mortality  
 562 ( $m_j$ ) is temperature-dependent and decreases with body size with a  $\beta$  of -  
 563 0.25 (Hansen et al., 1997; Kiørboe and Hirst, 2014) and  $\alpha$  of  $0.12 d^{-1}$ . These  
 564 scaling relationships were converted to be scaled with volume with a  $\beta$  of  
 565 -0.63 and  $\alpha$  of  $0.11 d^{-1}$ .

566 Zooplankton mortality due to predation by other zooplankton is resolved  
 567 in the model in the lower size classes, becoming progressively unresolved  
 568 with increasing size class. To account for the unresolved predation by higher  
 569 trophic levels (fish, carnivorous jellies, marine mammals), the zooplankton  
 570 quadratic mortality ( $a_j$ ) increases with biovolume with a  $\beta$  of 0.21 and  $\alpha$  of  
 571  $0.58 m^3 \text{ mmol } C^{-1} d^{-1}$ . We increased the quadratic mortality for largest  
 572 mesozooplankton by a factor of 4 because to account for higher level grazing.  
 573 The fraction of zooplankton quadratic mortality fluxing into particulate and  
 574 dissolved organic matter pools depends on diet and organisms size. With a  
 575 greater proportion of large zooplankton mortality being transferred to par-  
 576 ticulate organic matter pools compared to smaller zooplankton.

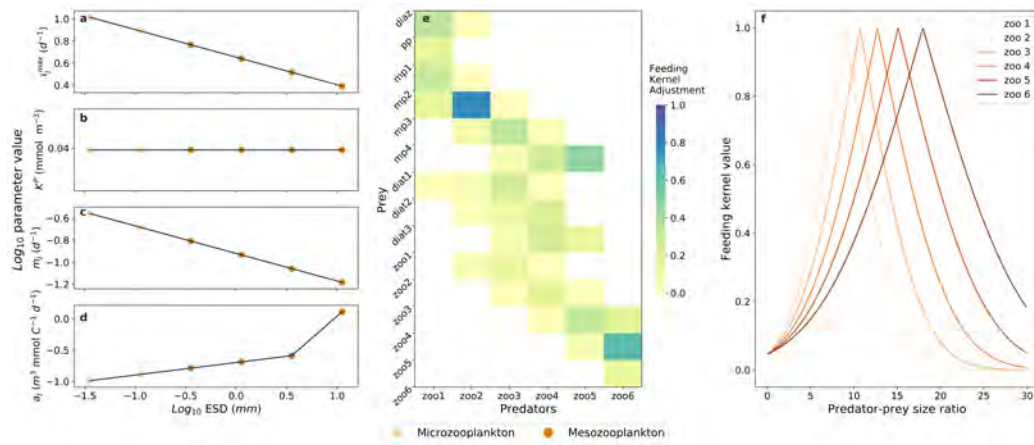

Figure 3: Zooplankton parameters. Relationships for microzooplankton (<0.2 mm ESD) (light orange) and mesozooplankton (>0.2 mm ESD) (dark orange) between equivalent spherical diameter (ESD) and a) maximum zooplankton ingestion rate ( $t_j^{max}$ ), b) zooplankton grazing half saturation constant for grazing ( $K^P$ ), c) linear mortality ( $m_j$ ), and (d) quadratic mortality ( $a_j$ ) (representing predation by higher trophic levels). e) Maximum grazing rates between predator and prey pairs and f) Value of the feeding kernel, which is then modified to give the feeding preference coefficient. The mean and width of the feeding kernel increases as zooplankton sizes increase.

## 577 2.5. Model Calibration

578 Many of the parameters required to simulate planktonic food webs are  
 579 difficult to measure directly, yet are highly important to simulate carbon  
 580 and energy flow patterns (Stock and Dunne, 2010). In order to produce a  
 581 balanced ecosystem, two main calibrations were done. First, the zooplank-  
 582 ton loss terms (linear and quadratic mortality) were calibrated to preserve  
 583 global totals of zooplankton production while largely maintaining allometric  
 584 trait relationships across size classes (Kiørboe and Hirst, 2014; Hansen et al.,  
 585 1997). We increased the zooplankton quadratic mortality for the largest  
 586 mesozooplankton by a factor of four to account for unresolved predation by  
 587 higher trophic levels. Phytoplankton linear mortality and aggregation loss  
 588 were also calibrated because these parameters are poorly constrained by ob-  
 589 servations. Instead of a single allometric scaling, linear mortality was set as  
 590 a fraction of  $PC_i^{ref}$ , with a factor of 0.02 for diatoms and 0.03 for all other  
 591 phytoplankton. The lower linear mortality in diatoms provides an advantage  
 592 over other phytoplankton and increased their global production. We also  
 593 removed the allometric scaling of phytoplankton aggregation loss ( $a_i$ ) with

594 body size to allow the same rate of aggregation loss for every phytoplankton.

595 Second, the grazing half-saturation prey concentration for zooplankton  
596 were calibrated to allow higher global total zooplankton production. These  
597 parameters are poorly constrained by observations (Hansen et al., 1997), but  
598 the values used (Table 3) still fall within the observed ranges in Hansen  
599 et al. (1997). Because grazing half-saturation constants have been shown to  
600 be independent of body size (Hansen et al., 1997), only one  $K^P$  had to be  
601 calibrated, because it was used for every zooplankton.

## 602 *2.6. Physical Framework*

603 MARBL-SPECTRA builds from the default MARBL configuration in  
604 CESM2.1 (MARBL-CESM2.1) in terms of biogeochemistry, plankton inter-  
605 action and transmission of light as described by tables and equations in Long  
606 et al. (2021). However, we have increased the number of plankton functional  
607 types and size classes to include greater diversity. Here we briefly provide  
608 an overview of MARBL-SPECTRA, and some more detailed description of  
609 the more complex ecosystem. More details and the full set of equations and  
610 parameters can be found in Long et al. (2021). MARBL runs within the  
611 ocean component of the Community Earth System Model version 2 (CESM  
612 2.1) (Moore et al., 2013b; Gent et al., 2011), which is the Parallel Ocean Pro-  
613 gram, version 2 (Smith et al., 2010). The physical configuration used here is  
614 very similar to that in CESM1, and a detailed description and evaluation of  
615 the ocean general circulation model in previous versions of CESM is given by  
616 Danabasoglu et al. (2012). The model has a nominal horizontal resolution  
617 of  $1^\circ$ , with 60 vertical depth levels ranging in thickness from 10 m in the  
618 upper 150m to 250 m in the deep ocean (Moore et al., 2013b). The sea-ice  
619 component (CICE) is described by Hunke et al. (2017).

620 MARBL-SPECTRA simulates 55 tracers, including 17 non-living tracers  
621 and 38 tracers associated with the plankton community. This includes 27  
622 tracers associated with the nine phytoplankton size classes, with each phy-  
623 toplankton C, Chl, and Fe tracked separated (Moore et al., 2001, 2004a).  
624 In addition, there are 3 phytoplankton Si tracers associated with the three  
625 diatom classes, as well as 2 phytoplankton  $\text{CaCO}_3$  tracers associated with  
626 the two implicit calcifiers that are part of the mixed phytoplankton classes.  
627 Constant stoichiometry was assumed for zooplankton, therefore only 6 zoo-  
628 plankton carbon tracers were included. The model simulates six dissolved  
629 organic matter pools, including semi-labile and refractory dissolved organic  
630 carbon, nitrogen, and phosphorus (Letscher and Moore, 2015; Letscher et al.,



631 2015). It also includes sinking particulate pools and an explicit simulation of  
632 the biogeochemical cycling of key elements (C, N, P, Fe, Si, O, plus alkalinity)  
633 (Moore et al., 2004a). Riverine nutrients (N, P, Si, Fe), dissolved inorganic  
634 carbon, alkalinity, and DOM fluxes are supplied to the CESM2 ocean model  
635 via the nutrient loading estimates from GlobalNEWS (Mayorga et al., 2010)  
636 and the Integrated Model to Assess the Global Environmental-Global Nutri-  
637 ent Model (IMAGE-GNM) (Beusen et al., 2015, 2016). The plankton com-  
638 munity component is coupled with a carbonate chemistry module based on  
639 the Ocean Carbon Model Intercomparison Project (OCMIP)(Najjar et al.,  
640 1999), allowing dynamic computation of surface ocean  $p\text{CO}_2$  and air-sea  $\text{CO}_2$   
641 flux.

642 MARBL-SPECTRA simulations are forced with the Common Ocean-Ice  
643 Reference Experiment (CORE-II) data set(Large and Yeager, 2009). The  
644 forcing period from 1948 to 2009 (62 years) underwent two repeating cy-  
645 cles. This differs from CORE-II protocol where forcing undergoes five re-  
646 peating cycles (Griffies et al., 2009). A shorter integration does not provide  
647 a fully-equilibrated model solution in the deep ocean, but has been used  
648 for studying surface ocean dynamics (Stock et al., 2014b). Thus, by the  
649 end of the 62 year spin up time, surface biomass distributions are nearing  
650 an equilibrium state, even if deep ocean tracers may not be. We focus our  
651 analyses on the final 20 years of the simulation (1990-2009). Code for gen-  
652 erating the namelist parameters for MARBL-SPECTRA are available at:  
653 [https://github.com/jessluo/gen\\_spectra](https://github.com/jessluo/gen_spectra). The version of MARBL used for  
654 these simulations is available at: <https://github.com/jessluo/MARBL/tree/spectra>.

### 655 3. Results

#### 656 3.1. Biogeochemical comparisons

657 MARBL-SPECTRA qualitatively captures large-scale global biogeochem-  
658 ical and ecological patterns evident in available observations. Simulated  
659 global annual mean marine NPP, POC export, and nitrogen fixation, av-  
660 eraged over the top 150 m, are shown in comparison to empirical estimates  
661 in Table 4. For these metrics, the model falls within range of empirical esti-  
662 mates. The global total marine diatom production is  $14 \text{ Pg C yr}^{-1}$ , which is  
663 about 28% of total NPP and falls within estimated values (20-40% of total  
664 NPP) (Nelson et al., 1995; Aumont et al., 2003). Global total zooplankton  
665 production is  $12 \text{ Pg C yr}^{-1}$  (23% of NPP), falling within empirical estimates

Table 4: Global annual averages of marine net primary production (NPP), sinking POC flux, and nitrogen fixation, averaged over the top 150m.

| Biogeochemical field | Global average            | Empirical estimate             | Reference                                                                       |
|----------------------|---------------------------|--------------------------------|---------------------------------------------------------------------------------|
| NPP                  | 52 Pg C yr <sup>-1</sup>  | 35-70 Pg C yr <sup>-1</sup>    | (Carr et al., 2006)                                                             |
| POC flux             | 6.8 Pg C yr <sup>-1</sup> | 4-12 Pg C yr <sup>-1</sup>     | (Dunne et al., 2007; DeVries and Weber, 2017)                                   |
| Nitrogen Fixation    | 107 Tg N yr <sup>-1</sup> | 51 - 196 Tg N yr <sup>-1</sup> | (Luo et al., 2014; Tang et al., 2019; Wang et al., 2019; Großkopf et al., 2012) |

666 (21-25% of NPP) (Landry and Calbet, 2004), with microzooplankton con-  
 667 tributing 8.7 Pg C yr<sup>-1</sup> to overall zooplankton production, and the remainder  
 668 3.3 Pg C yr<sup>-1</sup> coming from mesozooplankton production.

669 The model captures the large-scale surface (top 10 m) NO<sub>3</sub> (Fig. 4a-c),  
 670 PO<sub>4</sub> (Fig. 4d-f), and SiO<sub>3</sub> (Fig. 4g-i) distributions, with low nutrient con-  
 671 centrations in the subtropical gyres and higher nutrient concentrations in  
 672 subpolar and upwelling regions. Because the model simulation is 62 years,  
 673 the global nutrient distributions are not likely to be in a time-average steady  
 674 state, particularly in the deep ocean. Compared with the 2018 World Ocean  
 675 Atlas (WOA18) macronutrient observations (Garcia et al., 2019) (Fig. 4b,e  
 676 & h), near-surface NO<sub>3</sub>, PO<sub>4</sub>, and SiO<sub>3</sub> concentrations are slightly higher in  
 677 the model, with a bias of +0.50, +0.090, and -1.4 mmol m<sup>-3</sup> respectively.  
 678 For NO<sub>3</sub> and PO<sub>4</sub>, the bias is greatest in the tropical Pacific Ocean. This  
 679 could be due to a slightly lower export flux from the upper oceans, due to  
 680 higher nutrient recycling in this region coming from the dominance of smaller  
 681 phytoplankton (Fig. 8). SiO<sub>3</sub> biases are highest in the Southern Ocean, po-  
 682 tentially due to insufficiently vigorous diatom production depressing SiO<sub>3</sub>  
 683 consumption. In the subpolar North Pacific Ocean, the model shows lower  
 684 NO<sub>3</sub>, PO<sub>4</sub>, and SiO<sub>3</sub>, compared to the WOA18 observations (Fig. 4 c, f, i).  
 685 This underestimation of macronutrients in the North Pacific is likely due to  
 686 insufficient vertical mixing in this region, with phytoplankton production uti-  
 687 lizing surface nutrients faster than they can be replenished. Simultaneously,  
 688 overproduction of diatoms, due to insufficient *Fe* limitation stimulates the  
 689 utilization of nutrients, leading to under-representation of the high nitrate,  
 690 low chlorophyll (HNLC) region of the sub-Arctic North Pacific.

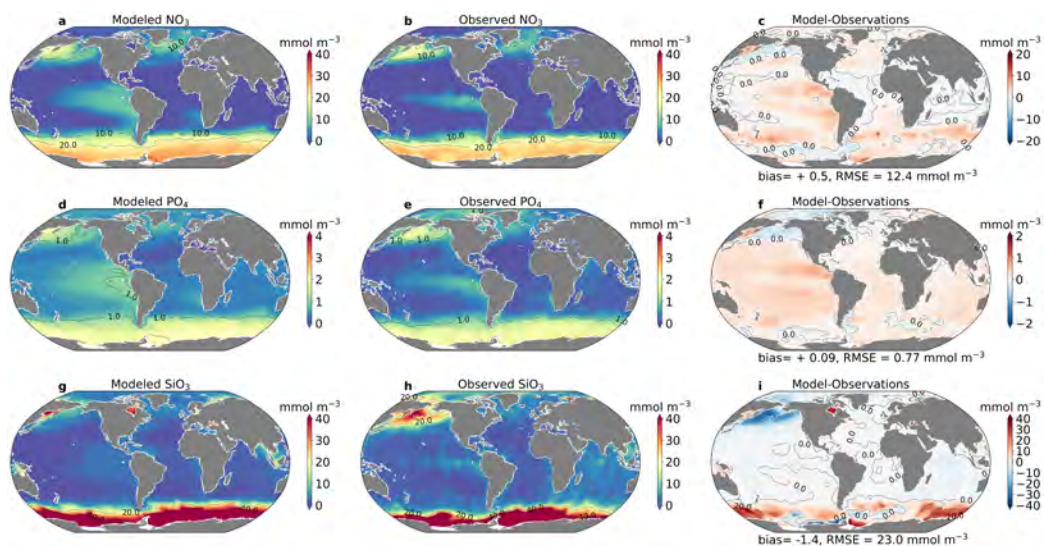

Figure 4: Macronutrients. Annual average modeled (a,d,g) and observed (b,e,h) surface (top 5m) concentrations of NO<sub>3</sub>, PO<sub>4</sub> and SiO<sub>3</sub> and their differences (Model-Observations; c,f,i). Observations are from the 2018 World Ocean Atlas release. (Garcia et al., 2019)

### 691 3.2. Limitation of model phytoplankton growth

692 Using phytoplankton-biomass-weighted means of the upper-ocean limita-  
693 tion terms, we show the nutrients most limiting growth for each phytoplank-  
694 ton in the model (Fig. 5). Phytoplankton growth is limited primarily by  
695 the availability of nitrate (NO<sub>3</sub>) or Fe and regionally by PO<sub>4</sub> (diazotrophs)  
696 and SiO<sub>3</sub> (diatoms) (Fig. 5), consistent with previous modelling studies us-  
697 ing CESM (Moore et al., 2013a; Long et al., 2021). The degree of growth  
698 limitation by nutrients becomes stronger as body size increases (Fig. 5).  
699 This occurs because smaller phytoplankton have greater capacity to acquire  
700 nutrients via diffusion relative to their nutrient demands (Edwards et al.,  
701 2012). Nutrient replete areas (white areas in Fig. 5) are characterized by  
702 where the concentration of nutrients is high enough to support growth rates  
703 > 90% of the maximum potential growth rate. For picoplankton, these occur  
704 in the equatorial upwelling region and the subpolar and polar regions (Fig.  
705 5a). For diazotrophs, these occur in equatorial regions of the Atlantic and  
706 Indian Oceans, as well as the western Pacific (Fig. 5b). Diatoms and mixed  
707 phytoplankton are rarely nutrient replete due to their high nutrient require-  
708 ments (Fig. 5c,d). In addition to these overall patterns, diazotrophs undergo  
709 stronger PO<sub>4</sub> limitation in the North Atlantic due to enhanced N<sub>2</sub> fixation

710 simulated by Fe associated with dust deposition (Wu et al., 2000).

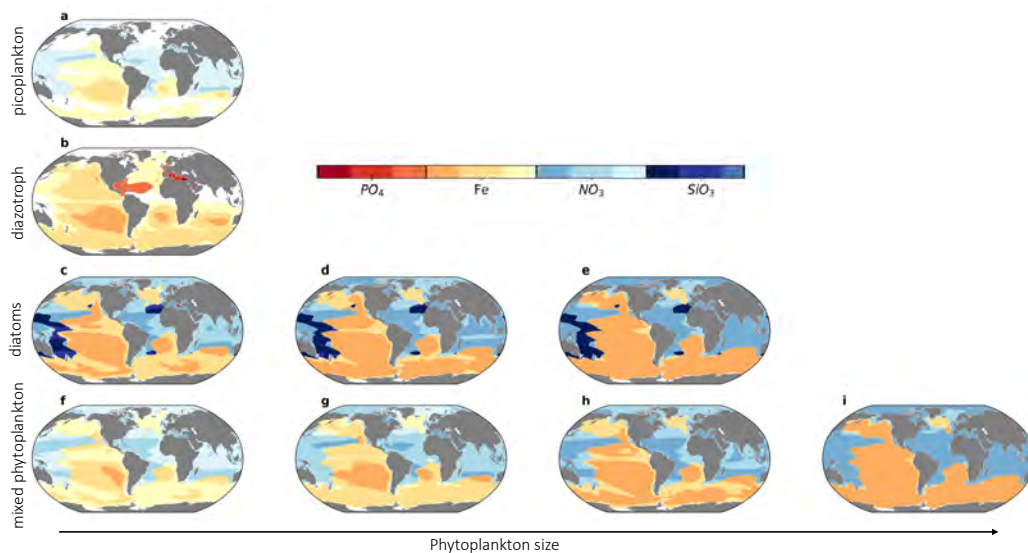

Figure 5: Phytoplankton nutrient limitation in top 100m. The nutrient most limiting phytoplankton growth over the 20 year climatology (January 1990- December 2009). Rows categorize phytoplankton by their functional group: (a) picoplankton, (b) diazotroph, (c) diatoms, and (d) mixed phytoplankton. Columns indicate relative phytoplankton size within each group, increasing from left to right.

### 711 3.3. Chlorophyll

712 Model annual-mean surface (top 10 m) chlorophyll exhibits plausible spa-  
713 tial gradients tied to provision of nutrients to the ocean surface and good over-  
714 all agreement with observations (Fig. 6). Surface chlorophyll observations  
715 were obtained from the Sea-viewing Wide Field-of-view Sensor(SeaWiFS)  
716 climatology from 1998-2009, which corresponds to the last twelve years of  
717 the CORE-II forcing dataset (Large and Yeager, 2009). Model chlorophyll is  
718 low in subtropical gyres due to wind-driven downwelling and low surface nu-  
719 trient availability (Fig. 4a). In higher latitudes and upwelling areas, higher  
720 nutrient concentrations allow for higher chlorophyll concentrations (Fig. 6a).  
721 Model annual average chlorophyll generally exceeds observations in subtrop-  
722 ical and temperate locations, while the model underestimates chlorophyll in  
723 the Arctic, Antarctic, and coastal upwelling regions (Fig. 6c).

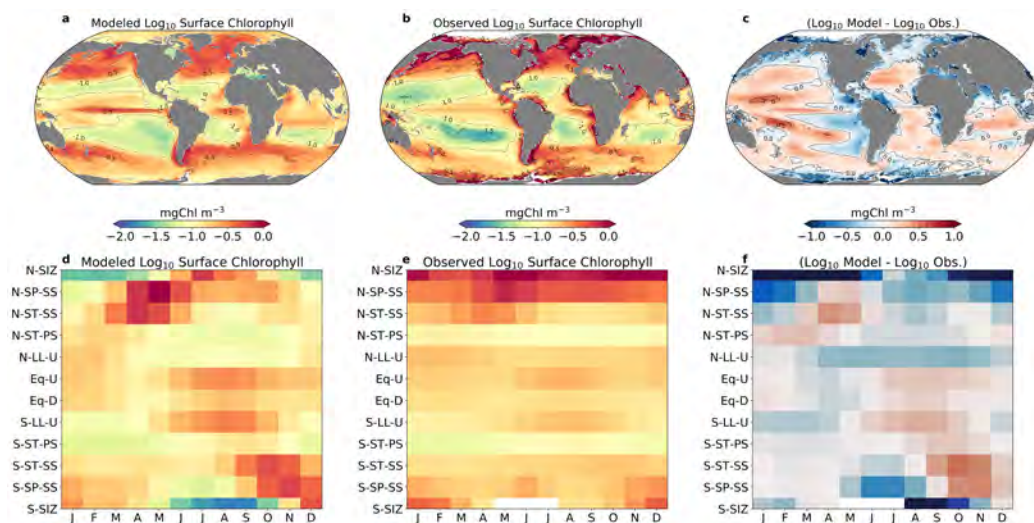

Figure 6: Surface (top 10 m) chlorophyll concentration ( $\text{mg Chl m}^{-3}$ ). (a) Simulated annual-mean surface chlorophyll, (b) satellite-derived (SeaWiFS) estimate of annual-mean surface chlorophyll, (c) model - SeaWiFS, (d) mean monthly modeled surface chlorophyll by biomes; (e) mean monthly SeaWiFS surface chlorophyll by biomes; and (f) difference between model and observations on a monthly, per-biome basis. Refer reader to biome map, and say how they were calculated.

724 The positive chlorophyll bias in subtropical and subpolar seasonally stratified  
 725 biomes of the northern hemisphere is due to an earlier than observed  
 726 phytoplankton bloom that starts in March and ends around June, about a  
 727 month earlier than the observed bloom in April through June (Fig. 6f).  
 728 This is perhaps due to lower mesozooplankton biomass in the spring from  
 729 lack of diaupasing zooplankton, yielding insufficient top-down control on phy-  
 730 toplankton and leading to an earlier spring bloom (Behrenfeld, 2014). The  
 731 higher chlorophyll concentrations in the central Equatorial Pacific between  
 732 July to November (Fig. 6f) are associated with higher nutrient delivery to  
 733 the surface from the Equatorial upwelling zone. In the subtropical and sub-  
 734 polar Southern Hemisphere, a stronger bloom initiates sooner (September)  
 735 than observational estimates (November/December) (Fig. 6f), leading to a  
 736 positive bias in subtropical and subpolar seasonally stratified biomes of the  
 737 Southern Hemisphere.

738 Vertical profiles of model chlorophyll show important biases compared  
 739 with observations. Comparing vertical chlorophyll profiles of The Bermuda  
 740 Atlantic Time-series Study (BATS), and the Hawaii Ocean Time-series (HOT)

741 stations (Fig. S2), MARBL-SPECTRA simulates a shallower deep chloro-  
742 phyll maximum (DCM) layer for BATS (60-80m) compared to HOT (70-  
743 100m). However, compared with observed values, MARBL-SPECTRA sim-  
744 ulates DCMs that are too shallow for both of these regions. For instance,  
745 data from HOT and BATS indicates a DCM layer falling between 60-120m  
746 for BATS (Steinberg et al., 2001), and 100-150m for the HOT station (Lete-  
747 lier et al., 2004). The tendency of these deep chlorophyll maximum to be  
748 shallower than observations may be due do a variety of reasons, such as the  
749 lack of representation of low-light adapted ecotypes of picoplankton which are  
750 generally restricted to the deep euphotic zone (Moore et al., 2002; Johnson  
751 et al., 2006; Moore and Chisholm, 1999) contributing to the deep chlorophyll  
752 maximum. The under-representation of mixotrophy in the model could also  
753 contribute to this bias, as it has been found that the incorporation of mixotro-  
754 phy in models has helped represent DCMs more accurately (Moeller et al.,  
755 2019).

#### 756 3.4. *Phytoplankton biogeography*

757 The distribution of small, medium, and large phytoplankton in the model  
758 is consistent with satellite-derived size class estimates from Hirata et al.  
759 (2011). The small group includes the picoplankton (pp) and the smallest  
760 mixed phytoplankton (mp1), the medium group includes the smallest diatom  
761 (diat1), the diazotroph (diaz), and the medium mixed phytoplankton (mp2),  
762 and the large group includes the largest two diatoms (diat2, diat3) and the  
763 largest two mixed phytoplankton (mp3, mp4). The satellite algorithm used  
764 by Hirata et al. (2011) estimates the biomass of three phytoplankton size  
765 classes as microphytoplankton ( $>20 \mu m$ ), nanophytoplankton ( $2-20 \mu m$ ) and  
766 picophytoplankton ( $<2 \mu m$ ).

767 Small phytoplankton dominate the subtropical gyres with over 70% of the  
768 total Chl<sub>a</sub> (Fig. 7c). These regions are characterized by strong vertical strati-  
769 fication and weak nutrient delivery to the surface. Here, small phytoplankton  
770 can outcompete larger phytoplankton due to their higher scaled nutrient and  
771 light affinities allowing them to maintain positive net growth at low nutri-  
772 ent concentrations compared to larger competitors (Edwards et al., 2012).  
773 Medium phytoplankton dominate in subpolar gyres, coastal upwelling zones,  
774 and equatorial upwelling regions where nutrient delivery is greater. Here,  
775 grazing pressure on small phytoplankton prevents small cells from consuming  
776 all resources and allows the medium phytoplankton to become established.  
777 The largest phytoplankton are found mainly in polar regions in the Arctic

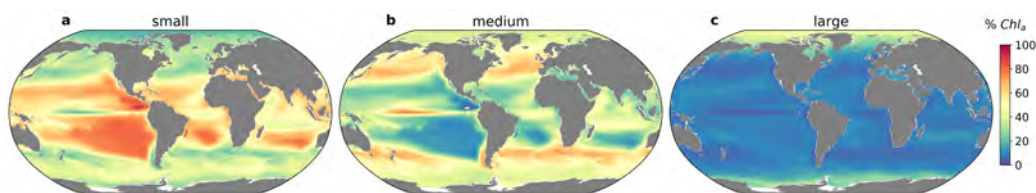

Figure 7: Phytoplankton size class biogeography. Percent of total chlorophyll in each size class: (a) Small phytoplankton (includes picoplankton and smallest mixed phytoplankton, (b) Medium phytoplankton (includes the smallest diatom, the second smallest mixed phytoplankton, and the diazotroph), and (c) Large phytoplankton (includes the two largest mixed phytoplankton, and the largest two diatoms on the model).

778 and Southern Oceans, where the balance between growth and predation on  
779 small and medium phytoplankton, together with lower light affinities, allows  
780 these larger phytoplankton to survive.

781 Diatoms illustrate the importance of modelling different size classes within  
782 each phytoplankton functional type. Diatoms are found from the tropics to  
783 the poles, but are most abundant in polar to temperate, nutrient-rich regions,  
784 where silicic acid and other nutrients are not limiting. However, the distribu-  
785 tion of modeled diatoms varies by size and associated organism traits (Fig.  
786 S3g-i). Compared with other diatoms, the smallest diatom has a higher spe-  
787 cific growth rate, lower nutrient half-saturation constants, and higher affinity  
788 for light (Fig. 2), but also proportionally higher losses to mortality and graz-  
789 ing (Fig. 2; 3). Small diatoms are most abundant in coastal, equatorial  
790 upwelling, and subpolar regions (Fig. S3g). Larger diatoms have somewhat  
791 lower growth rates, weaker nutrient uptake abilities, and lower light affinity  
792  $\alpha_i^{Chl}$ , but lower mortality and losses to grazing (Fig. 2; 3). Large diatoms,  
793 therefore, are most abundant in subpolar and polar regions (Fig. S3i). The  
794 ability to model different size classes within each functional group allows us  
795 to observe these patterns that would otherwise not be resolved.

796 The phytoplankton size abundance relationship is a general descriptor  
797 of phytoplankton community size structure, and plays a fundamental role  
798 in pelagic ecosystems as it determines the trophic organization of plankton  
799 communities and, hence, the biogeochemical functioning of the ecosystem  
800 (Legendre and Rassoulzadegan, 1996; Kiørboe, 1993). The relationship be-  
801 tween phytoplankton abundance and cell volume ( $V$ ) follows a power law,  
802  $N = \alpha V^\beta$ , where  $N$  is the cell density and  $\alpha$  is the intercept of the resulting  
803 linear regression. The size-scaling exponent,  $\beta$ , is a descriptor of commu-

804 nity size structure (Marquet et al., 2005) and generally takes values between  
805 -1.3 and -0.6 (Huete-Ortega et al., 2012). The slope of the size abundance  
806 relationship was calculated by plotting the logarithmic abundances of all  
807 phytoplankton size classes as a function of their volume.

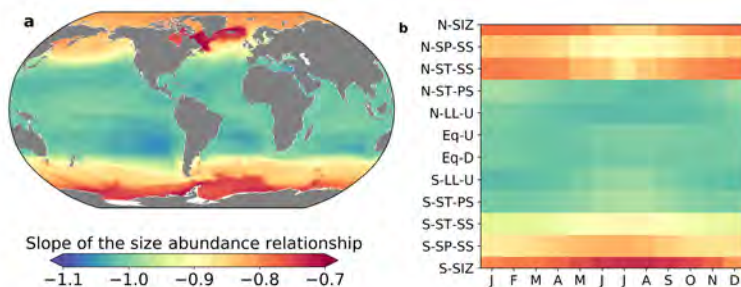

Figure 8: Slope of the size abundance relationship. (a) The annual averaged surface slope of the size abundance relationship, and (b) mean monthly surface slope of the size abundance relationship by biomes (Fig. S1) over the period 1990–2009. More negative slopes are seen in the stratified waters of low-latitude, open-ocean environments, where small cells account for most of the biomass, and less negative slopes appear in more nutrient-rich, productive regions, where larger cells generally constitute a greater fraction of total biomass than in lower nutrient regions.

808 Overall, MARBL-SPECTRA captures the horizontal gradients in size  
809 driven by the provision of nutrients to the ocean surface (Barton et al., 2013).  
810 Locations with more negative slopes tend to have relatively few large phy-  
811 toplankton present, whereas a less negative slope indicates the presence of  
812 proportionally more large phytoplankton (Cermeño et al., 2006). In MARBL-  
813 SPECTRA (Fig. 8b), the most negative slopes (between -1.2 and -0.9) oc-  
814 cur in the permanently stratified oligotrophic subtropical gyres where small  
815 phytoplankton dominate and large cells are scarce (Fig. 7). The highest  
816 contribution of small cells is especially seen during the boreal and austral  
817 summer of permanently stratified subtropical gyres, and lower latitude up-  
818 welling regions (Fig. 8b). The least negative slopes ( $>-0.9$ ) are found in  
819 more productive regions of the ocean, like the subpolar and polar regions  
820 where larger phytoplankton have a higher contribution to total phytoplank-  
821 ton biomass (Fig. S3). Seasonally, less negative slopes are found during  
822 the boreal and austral Winter of the seasonal ice zone, and the northern  
823 seasonally stratified subpolar gyre (Fig. 8b).



824 *3.5. Zooplankton production*

825 MARBL-SPECTRA's global zooplankton production is mostly composed  
826 of microzooplankton. Approximately 73% of the total zooplankton produc-  
827 tion comes from microzooplankton ( $<200 \mu\text{m}$  ESD), represented by the two  
828 smallest zooplankton groups. These zooplankton dominate the grazing on  
829 picoplankton and small mixed phytoplankton. As a result, the microzoo-  
830 plankton are broadly distributed and are most abundant in the oligotrophic  
831 and subpolar regions (Fig. S4a,b). MARBL-SPECTRA simulates cross-  
832 biome patterns in mesozooplankton biomass, with the highest values in the  
833 North Pacific, the equatorial Pacific, and coastal upwelling regions (Fig. 9a).

834 We compare model zooplankton biomass to observations from the NOAA  
835 COPEPOD global zooplankton database (<https://www.st.nmfs.noaa.gov/copepod/>),  
836 of which the global mesozooplankton carbon biomass dataset is the most  
837 relevant and accessible (Moriarty and O'Brien, 2013), for model output com-  
838 parison. However, since the COPEPOD database compiles measurements  
839 collected by net-tows of epipelagic mesozooplankton captured primarily us-  
840 ing large,  $300 \mu\text{m}$  nets that under sample small mesozooplankton (Moriarty  
841 and O'Brien, 2013; Landry et al., 2001; O'Brien, 2005)), we only used the  
842 three largest mesozooplankton (zoo4-zoo6) for our model-data comparison.  
843 Additionally, because the COPEPOD database includes more samples during  
844 summer months, we only compared with summer months of each hemisphere  
845 (Fig. 9a,b). When comparing modeled and observed mesozooplankton across  
846 biomes (Fig. 9c-e), we excluded biomes containing less than 25% of observa-  
847 tions at each month. MARBL-SPECTRA's annual average mesozooplankton  
848 biomass (only accounting for grid cells with observations) averages  $2.7 \text{ mg C m}^{-3}$ ,  
849 compared with COPEPOD's annual average of  $4.7 \text{ mg C m}^{-3}$ . The  
850 discrepancy from the model and observations comes from coastal upwelling  
851 regions in the model having lower biomass than observed in the COPEPOD  
852 database. Mesozooplankton biomass is lowest in the Southern Ocean and  
853 the sub-Arctic North Atlantic (Fig. 9a). Compared with the COPEPOD  
854 database observations, MARBL-SPECTRA overestimates mesozooplankton  
855 biomass in subtropical regions (Fig. 9e). This can be seen especially in gra-  
856 dients between coastal and offshore regions (e.g. near California Current),  
857 where high mesozooplankton production near the coast does not decrease  
858 to considerably lower values as you move to the oligotrophic regions in the  
859 model output. Thus, MARBL-SPECTRA captures basin-scale gradients in  
860 zooplankton biomass, but the dynamic range in the model is reduced com-  
861 pared with observations.

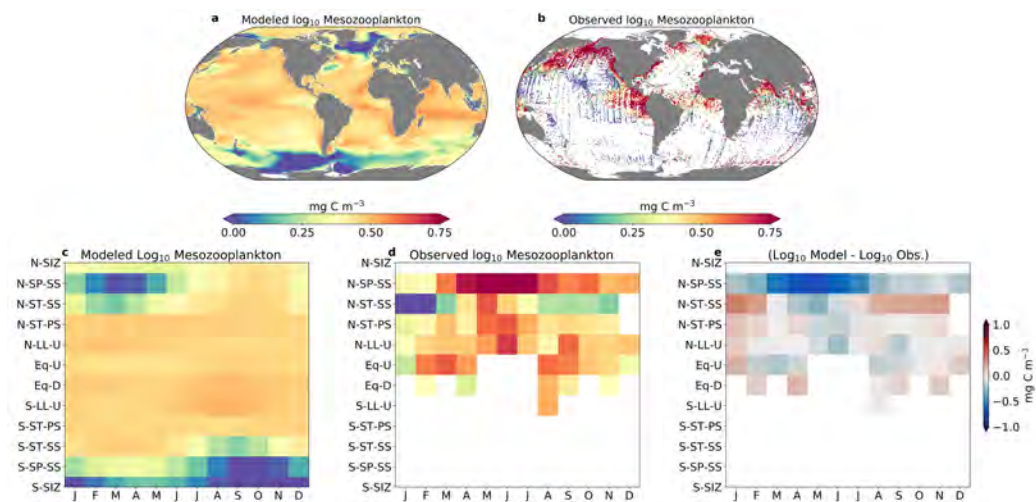

Figure 9: Mesozooplankton biomass. (a) Modeled annual mean mesozooplankton biomass ( $\text{mg C m}^{-3}$ ) over the top 150 m (only including largest three mesozooplankton (zoo4 - zoo6), compared with (b) observed annual average mesozooplankton biomass using the COPEPOD database ( $\text{mg C m}^{-3}$ ) (Moriarty and O'Brien, 2013). (c) Mean monthly modeled surface mesozooplankton biomass by biomes; (d) mean monthly COPEPOD mesozooplankton biomass by biomes (only showing biomes that have more than 25% of data at each month); and (e) difference between model and observations.

862 Model mesozooplankton biomass in MRABL-SPECTRA display a weaker  
 863 spatial dynamic range compared to observations. The strong negative bias  
 864 of modeled mesozooplankton (Fig. 9e) in the subpolar and subtropical sea-  
 865 sonally stratified biomes of the Northern Hemisphere comes from the un-  
 866 derestimation of mesozooplankton biomass in the sub-Arctic North Atlantic,  
 867 along with a 3-4 month delay in the zooplankton bloom (Fig. 9e). MARBL-  
 868 SPECTRA does not resolve zooplankton life histories, including dormancy  
 869 or diapause, which may contribute to these discrepancies. Due to limited  
 870 observations, we are unable to diagnose seasonal zooplankton biomass pat-  
 871 terns in poorly-sampled regions of the ocean (Fig. 9d). However, MARBL-  
 872 SPECTRA simulates a Southern Hemisphere subpolar zooplankton bloom  
 873 from December to March and the subtropical seasonally stratified bloom in  
 874 the Southern Hemisphere from October to June (Fig. 9c). The low latitude  
 875 upwelling region in the Southern Hemisphere shows a model mesozooplank-  
 876 ton bloom from June to October, similar to a shorter one observed in the  
 877 equatorial upwelling region from June to September.

878 *3.6. Generation time*

879 MARBL-SPECTRA simulates plankton generation times and allows us to  
880 analyze their influence by organism size, temperature, and latitude. Plank-  
881 ton generation time was calculated as the ratio of depth-integrated biomass  
882 ( $\text{mmol m}^{-2} \text{ C}$ ) over production ( $\text{mmolC m}^{-2} \text{ d}^{-1}$ ), averaged over the top  
883 150m. The global average generation time for phytoplankton increased with  
884 body size, ranging from a few days for picoplankton to a few months for  
885 the largest mixed phytoplankton (Fig. 10a). Global average zooplankton  
886 generation times ranged from about a week for the smallest microzooplank-  
887 ton to a few months for the largest mesozooplankton. However, there are  
888 considerable regional variations in generation time. The longest generation  
889 times reached almost a year for the largest mixed phytoplankton and almost  
890 two years for mesozooplankton near the poles, with the shortest generation  
891 times found in the tropics (Fig. SI S7,S8). These variations in generation  
892 time reflect body size and temperature effects (Gillooly et al., 2001; Gillooly,  
893 2000; Gillooly et al., 2002), although, consumption, respiration, predation,  
894 and mortality are also of influence. Generation times for some copepod  
895 species have been observed to reach up to 3-4 years (Hirche, 1997). However,  
896 MARBL-SPECTRA does not resolve zooplankton life histories such as dia-  
897 pause, which limits generation times for some mesozooplankton especially in  
898 polar regions.

899 *3.7. Trophic Scaling*

900 The model indicates not only zooplankton biomass and generation length,  
901 but food chain length and zooplankton trophic level. Using the grazing fluxes  
902 between predators and prey, we calculated the trophic level for each zooplank-  
903 ton by assigning a value depending on their prey. For example, zooplankton  
904 in the second trophic level are those who only feed on phytoplankton, with  
905 additional trophic levels beyond this added depending on the trophic level of  
906 zooplankton they eat as prey at each grid cell. Model simulations show aver-  
907 age zooplankton trophic levels to be highest in the oligotrophic subtropical  
908 gyres and lowest in polar regions around the Southern Ocean and the Arctic  
909 Ocean (Fig. 10b & Fig. S6). Low productivity regions of the ocean tend to  
910 have longer, less efficient food chains, suggesting a greater flow of energy and  
911 carbon through the microbial loop (Steinberg and Landry, 2017). Produc-  
912 tive regions with lower zooplankton trophic levels tend to have shorter, more  
913 efficient food chains (Fig. 10b), suggesting a more efficient energy transfer  
914 towards upper food web levels. Thus, for each given zooplankton size class

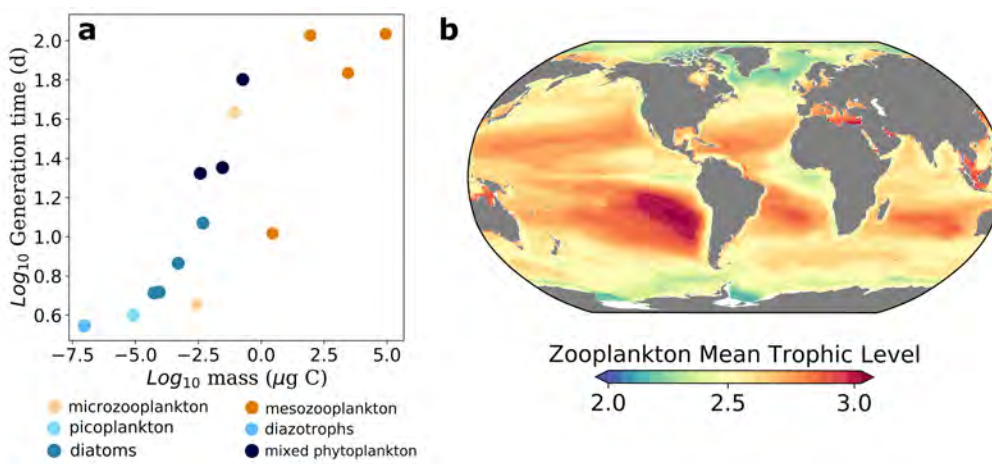

Figure 10: Predator-prey generation time and trophic dynamics. (a) Annual global average generation time averaged over the top 150m in days for each phytoplankton (blue), and zooplankton (orange) size class, as a function of organisms body mass (units). (b) Zooplankton annual mean trophic level over the top 150 m. A trophic level of 2 indicates an entirely herbivorous zooplankton feeding on primary producers. A trophic level 3 indicates secondary consumers, which are carnivorous zooplankton that eat herbivores.

915 (Fig. S6), the average trophic level for each type of model zooplankton in-  
916 creased in the low nutrient, subtropical gyres, illustrating the predomance  
917 of lengthened food webs in those regions. In contrast, the Southern Ocean  
918 and the Arctic Ocean are not characterized by high trophic levels but are  
919 areas of elevated zooplankton biomass, especially large mesozooplankton.

### 920 3.8. Zooplankton to phytoplankton biomass ratio

921 MARBL-SPECTRA resolves spatial and temporal variations in the biomass  
922 pyramid in lower trophic levels of marine ecosystems, and consequently can  
923 provide mechanistic insights on factors regulating this structure. Regions of  
924 high phytoplankton and zooplankton biomass are concentrated in subpolar  
925 and coastal regions, whereas the oligotrophic gyres support much lower total  
926 biomass (Fig. S5a,b). The zooplankton to phytoplankton biomass ratio is at  
927 or below 1 in most of the ocean, consistent with observations from Irigoien  
928 et al. (2004); Gasol et al. (1997), and modelling results in marine (Vallina  
929 et al., 2014) and lake systems (Yuan and Pollard, 2018). Z:P biomass ratios  
930 are also shown to vary seasonally, in this case focusing on data from North-  
931 ern Hemisphere subpolar and polar regions (35°N-90°N). Here, the highest

932 Z:P ratios occurred in winter months, driven by declines in phytoplankton  
933 biomass (Fig. 11c).

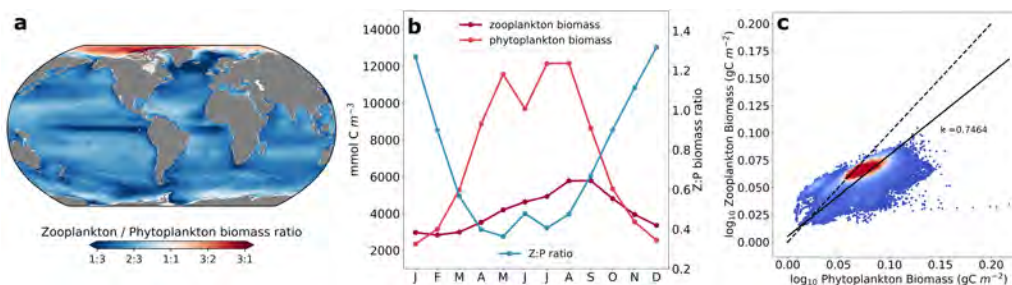

Figure 11: Predator-prey biomass ratios. (a) Global map of the zooplankton to phytoplankton biomass ratio, showing the depth integrated annual mean over the top 150 m. (b) Seasonal zooplankton biomass (dark pink), phytoplankton biomass (light pink), and zooplankton to phytoplankton biomass ratio (blue) of polar and subpolar regions in the Northern Hemisphere (35°N-90°N). (c) log<sub>10</sub> zooplankton and phytoplankton biomass relationship integrated over the top 150 m. The dashed black line represents the 1:1 line, and the solid black line represents the least squares line of best fit, which has an exponent of 0.7464 in bold (with 95% CI).

934 The model indicates that as phytoplankton biomass increases, so too does  
935 zooplankton biomass. However, the rate of increase in zooplankton biomass  
936 is less than for phytoplankton biomass, such that the slope of the log<sub>10</sub>-  
937 log<sub>10</sub> relationship between model phytoplankton and zooplankton biomass is  
938 approximately 0.75 (Fig. 11b). Our results are consistent with a 3/4 scal-  
939 ing exponent between prey and predator biomass observed by Hatton et al.  
940 (2015). In regions of low phytoplankton biomass, such as the oligotrophic  
941 gyres, Z:P ratios are close to 1:1, suggesting a tight and efficient coupling  
942 between small phytoplankton and their microzooplankton consumers. In re-  
943 gions of higher phytoplankton biomass, Z:P ratios are lower, suggesting a  
944 greater degree of decoupling between predators and prey.

945 One exception from this overall relationship is the Arctic Ocean, which  
946 has much higher Z:P ratios, in some cases approaching 3:1. Here, the balance  
947 between strong seasonal bottom-up (light and temperature) controls and  
948 intense grazing pressure in these regions might explain the high Z:P biomass  
949 ratios.

### 950 3.9. Plankton phenology

951 The enhanced plankton community in MARBL-SPECTRA provides a  
952 mechanistic representation of the function and dynamics of plankton phenol-

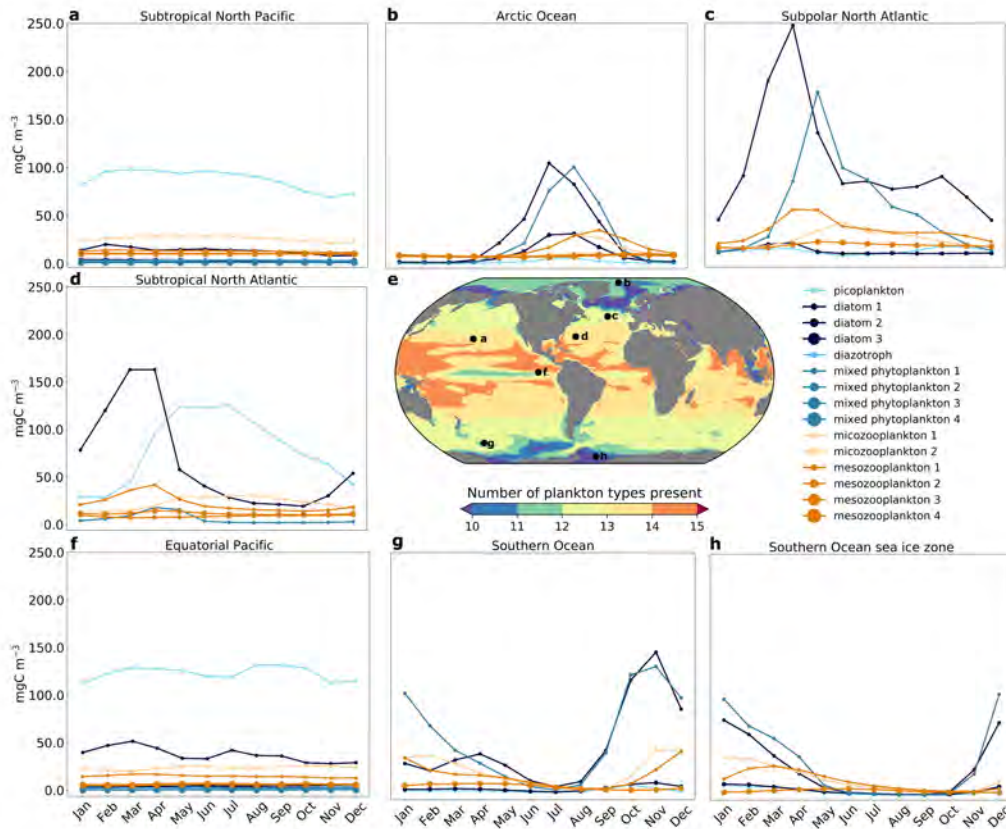

Figure 12: Plankton phenology. Average number of plankton present at a level more than 1% of the total plankton biomass for a given grid cell at any time of the year (e). Seasonal cycles for phytoplankton (blue) and zooplankton (orange) in a  $5^\circ$  by  $5^\circ$  region in the (a) Subtropical North Pacific ( $47-51^\circ N$ ,  $165-160^\circ W$ ), (b) Arctic Ocean ( $78-83^\circ N$ ,  $1-6^\circ W$ ), (c) Subpolar North Atlantic ( $45-50^\circ N$ ,  $27-32^\circ W$ ), (d) Subtropical North Atlantic ( $78-83^\circ N$ ,  $1-6^\circ W$ ), (f) Equatorial Pacific ( $2^\circ N-2^\circ S$ ,  $97-101^\circ W$ ), (g) Southern Ocean ( $47-61^\circ S$ ,  $171-175^\circ W$ ), and (h) Southern Ocean sea ice zone ( $66-70^\circ S$ ,  $38-42^\circ W$ ). The seasonal cycles are calculated from 20 year (1990-2009) biomass climatologies from the model.

953 ogy, where the phenology of model plankton is tied to their body size, traits,  
 954 and interactions. Here, we show the seasonal cycle of biomass for seven  $5^\circ$   
 955 by  $5^\circ$  locations in the global ocean (Fig. 12). While the details of a given  
 956 site may differ between the model and observations for a range of reasons,  
 957 the model simulates a seasonal succession at each location tied to nutrient  
 958 delivery, temperature, light availability, and grazing pressure.

959 For example, in the subtropical North Pacific ( $47 - 51^{\circ}N$ ,  $165 - 160^{\circ}W$ ;  
960 Fig. 12a), low nutrient availability leads to picoplankton dominance through-  
961 out the year. Strong grazing pressure from small microzooplankton together  
962 with low nutrient delivery allows for the dominance of relatively small phy-  
963 toplankton. The Equatorial Pacific ( $2^{\circ}N-2^{\circ}S$ ,  $97-101^{\circ}W$ ; Fig. 12f) is simi-  
964 larly dominated by picoplankton throughout the year with weak seasonality,  
965 however shows a higher contribution of small diatoms due to higher nutrient  
966 inputs from Equatorial upwelling (Fig. 4). Conversely, in the subpolar North  
967 Atlantic region ( $45 - 50^{\circ}N$ ,  $27 - 32^{\circ}W$ ; Fig. 12c), MARBL-SPECTRA simu-  
968 lates a Spring bloom dominated by small diatoms and mixed phytoplankton.  
969 The bloom decreases with the emergence of small microzooplankton and  
970 mesozooplankton grazing, followed by the development of a fall bloom com-  
971 posed of small diatoms. The Subtropical North Atlantic ( $78 - 83^{\circ}N$ ,  $1 - 6^{\circ}W$ ;  
972 Fig. 12d), shows a similar, but weaker spring bloom dominated by the small  
973 diatoms, decreasing with the emergence of mesozooplankton grazing. This  
974 bloom is followed by a longer fall and summer picoplankton bloom. In the  
975 Southern Ocean ( $47 - 61^{\circ}S$ ,  $171 - 175^{\circ}W$ ; Fig. 12g), small diatoms and  
976 mixed phytoplankton drive a late Spring/early austral Summer bloom due  
977 to high nutrient supply. A similar but shorter bloom occurs in the Southern  
978 Ocean sea-ice zone ( $66 - 70^{\circ}S$ ,  $38 - 42^{\circ}W$ ; Fig. 12h) driven by the small  
979 diatoms and mixed phytoplankton. In the Arctic Ocean ( $78 - 83^{\circ}N$ ,  $1 - 6^{\circ}W$ ;  
980 Fig. 12b), small and medium diatoms and small mixed phytoplankton drive  
981 a boreal Summer bloom decreasing with the emergence of microzooplankton  
982 and mesozooplankton grazing.

983 Overall, MARBL-SPECTRA can simulate phenology and succession in a  
984 more diverse fashion than models with fewer taxa. We calculated the total  
985 number of phytoplankton and zooplankton taxa present at greater than 1% of  
986 total biomass of phytoplankton and zooplankton in each month of the year,  
987 and averaged this over all months, to find the averaged number of model  
988 species present at any time of year. The highest average number of plankton  
989 present contributing to more than 1% of plankton biomass are seen in the  
990 subtropical gyres, especially near coastal boundary currents (Fig. 12e). The  
991 weak seasonality, and high contribution of small phytoplankton and micro-  
992 zooplankton throughout the year might contribute to this greater number of  
993 plankton present in the subtropical gyres compared to other regions. Mean-  
994 while, the higher nutrient concentration in the Equatorial upwelling region,  
995 drivers a the opportunist small diatoms to dominate most of the plankton  
996 biomass decreasing the number of plankton types present (Fig. 12e & Fig.

997 S3). Polar regions display a lower average number of plankton types present  
998 throughout the year due to strong seasonality, and higher dominance of larger  
999 plankton types (Fig. 12e & Fig. 8).

## 1000 4. Discussion

### 1001 4.1. Significant model advances

1002 MARBL-SPECTRA is a plankton community model that expands on  
1003 plankton functional types and size classes compared to previous CESM plank-  
1004 ton community models. The union of functional type modelling with size-  
1005 resolved, trait-based models provides a tractable approach to simulate the  
1006 critical biogeochemical cycles mediating the large-scale structure of carbon  
1007 and nutrient distributions and the complex and nuanced variation of plank-  
1008 tonic ecosystems controlling trophic energy transfer. MARBL-SPECTRA  
1009 provides a framework to simulate seasonal and regional changes in phyto-  
1010 plankton phenology and diversity and their roles in ecosystem functioning  
1011 and biogeochemical processes. The mechanistic representation of these pro-  
1012 cesses allows for the identification of key drivers influencing plankton sea-  
1013 sonal succession and uncovers the roles of various functional groups in com-  
1014 munity interactions such as competition and predation. The incorporation  
1015 of MARBL-SPECTRA into CESM enables mechanistic projections of how  
1016 plankton communities are responding to seasonal and interannual changes  
1017 in their environment as well as how they might respond to future environ-  
1018 mental change. The inclusion of more plankton functional types and size  
1019 classes improves the representation of plankton spatial and temporal bio-  
1020 geography. Highly productive regions tend to be dominated by fast-growing  
1021 nutrient opportunists (i.e. small diatoms) (Fig. S3). Stratified, unproduc-  
1022 tive oligotrophic regions are dominated by slow-growing microbes with high  
1023 nutrient affinity (i.e., picoplankton) (Fig. S3), whose low nutrient require-  
1024 ments tied with their low growth and mortality rates allow them to prevail  
1025 throughout the year. The largest phytoplankton survive mainly in higher  
1026 latitudes in large part because their losses to predation are relatively low,  
1027 even though they tend to grow slowly and are less competitive for nutrients  
1028 compared with smaller phytoplankton. Additionally, including picoplankton  
1029 in MARBL-SPECTRA compared to previous versions of CESM was key in  
1030 differentiating community size structure across the globe. These advantages  
1031 were particularly apparent in the oligotrophic gyres of the ocean, where pi-



1032 coplankton contribute to about 70% of the total Chl, substantially improving  
1033 the dynamic range of chlorophyll in the model.

1034 The more diverse plankton community in MARBL-SPECTRA simulates  
1035 the seasonal succession of plankton communities tied to nutrient delivery,  
1036 temperature, light availability, and grazing pressure. Diatoms dominate the  
1037 spring bloom in temperate regions due to the onset of thermal stratification  
1038 increasing light availability. Sufficient light and nutrient supply aid the rapid  
1039 growth of the smallest diatoms. Mixed phytoplankton develop in late spring  
1040 following strong microzooplankton and mesozooplankton grazing pressure on  
1041 diatoms. In autumn, a weaker small diatom bloom occurs in many regions,  
1042 driven by nutrient delivery to the surface due to enhanced mixing under fa-  
1043 vorable light conditions. In polar regions, this small diatom bloom is shifted  
1044 towards boreal and austral summer due to lower light availability and sea ice  
1045 dynamics influencing phytoplankton growth. The small diatoms and mixed  
1046 phytoplankton dominate the onset of the bloom, but larger diatoms still con-  
1047 tribute to overall biomass due to high nutrient concentrations. This bloom  
1048 declines with increased microzooplankton and mesozooplankton grazing and  
1049 decreases in light availability towards the end of the summer. Tropical and  
1050 subtropical regions display a weaker seasonality in phytoplankton blooms  
1051 coming from more stable light availability throughout the year and lower nu-  
1052 trient concentrations. Throughout the tropics and subtropics, but especially  
1053 in oligotrophic regions of the ocean, picoplankton dominate throughout the  
1054 year, with lower contributions of mixed phytoplankton and diatoms to overall  
1055 biomass.

1056 The grazing relationships between predator and prey capture information  
1057 on food chain length and zooplankton trophic level with apparent differences  
1058 across productive and unproductive regions of the ocean. In low-productivity  
1059 waters, picoplankton are the dominant phytoplankton type (Fig. 7 & 8), with  
1060 microzooplankton as their main predators, consuming 75% of the primary  
1061 production in oligotrophic regions. The remaining production is channeled  
1062 directly through mesozooplankton or lost to sinking and other advective pro-  
1063 cesses. The tight coupling between phytoplankton, microzooplankton, and  
1064 mesozooplankton results in longer food chains in oligotrophic regions com-  
1065 posed of more trophic levels (Fig. 10b) compared to other regions in the  
1066 ocean. Oligotrophic regions in the model favor the recycling of organic matter  
1067 rather than its efficient transfer upward toward higher trophic levels (Azam  
1068 et al., 1983; Legendre and Le Fèvre, 1995). Meanwhile, productive regions  
1069 are characterized by shorter trophic pathways (Fig. 10b) with a larger frac-

1070 tion of particulate organic carbon exported from the euphotic zone (Fig.  
1071 S9). This is due either directly through the sinking of ungrazed cells or in-  
1072 directly through the sedimentation of aggregated detritus and zooplankton  
1073 fecal pellets, resulting in a biological pump more efficient in transporting  
1074 biogenic carbon towards the ocean's interior (Guidi et al., 2009; Boyd and  
1075 Trull, 2007).

1076 The increased model resolution of phytoplankton and zooplankton size  
1077 classes enables us to study the relative abundance of predators and prey  
1078 across regions of contrasting productivity. Zooplankton to phytoplankton  
1079 biomass ratios (Z:P) are consistent with a  $3/4$  scaling exponent observed  
1080 by Hatton et al. (2015), with zooplankton biomass increasing at a lower rate  
1081 than phytoplankton biomass. Coastal upwelling and other productive regions  
1082 of the ocean display lower zooplankton to phytoplankton biomass fractions  
1083 compared with oligotrophic regions of the ocean. The decrease in Z:P ratio  
1084 with a eutrophication gradient is consistent with observations (Gasol et al.,  
1085 1997; Yuan and Pollard, 2018; Hatton et al., 2015), but deviates from other  
1086 modelling analyses that show an increase in Z:P ratio with a eutrophication  
1087 gradient (Ward et al., 2014; Vallina et al., 2014). One reason for lower Z:P  
1088 ratios in productive regions could be due to the longer generation times of  
1089 mesozooplankton (weeks to months) compared to microzooplankton (days),  
1090 which may impede them from thriving in upwelling regions where strong  
1091 fluctuations in food supply and environmental conditions occur. Addition-  
1092 ally, the use of the Holling Type II grazing function, which keeps predation  
1093 pressure relatively high at low prey concentrations, may prevent mesozoo-  
1094 plankton production from decreasing too much in oligotrophic regions of the  
1095 ocean. Another reason for this deviation could be due to the high sensitiv-  
1096 ity of zooplankton biomass to linear and quadratic mortality values in the  
1097 model. Higher zooplankton quadratic mortalities for the mesozooplankton  
1098 reflect higher trophic level grazing. The high mortality values can there-  
1099 fore decrease mesozooplankton biomass especially in upwelling regions of the  
1100 ocean, contributing to a weaker dynamic range in mesozooplankton biomass  
1101 between oligotrophic and eutrophic regions.

#### 1102 *4.2. Limitations & future improvement*

1103 All plankton community models, including MARBL-SPECTRA, are sim-  
1104 plications of natural plankton communities that seek to simulate phyto-  
1105 plankton physiology, predator-prey interactions, community structure, and  
1106 biodiversity in a dynamic environment. MARBL-SPECTRA incorporates 9

1107 phytoplankton and 6 zooplankton types, where the traits of organisms and  
1108 their interactions are determined by organism size and functional group, in  
1109 the case of phytoplankton. While this approach is computationally tractable  
1110 and allows for the study of lower trophic levels in the marine environment, it  
1111 has several important limitations.

1112 First, our model does not account for zooplankton life histories such as  
1113 diapause. Diapause is a critical component of the life history of copepods, as  
1114 it allows them to survive long periods of unfavorable environmental condi-  
1115 tions (Hairston Jr and Munns Jr, 1984). Copepods accumulate lipid reserves  
1116 prior to diapause, and are highly nutritious prey for a wide variety of preda-  
1117 tors in the oceans (Bauermeister and Sargent, 1979). Diapausing copepods  
1118 are especially important in polar, subpolar, and temperate environments  
1119 where *Calanoid* copepods are a key intermediary in the process of trophic  
1120 energy transfer from phytoplankton to higher trophic levels (Baumgartner  
1121 and Tarrant, 2017). The exclusion of zooplankton life histories can bias  
1122 mesozooplankton biomass in polar, subpolar, and temperate regions, partic-  
1123 ularly in the spring (Fig. 9), when copepods are emerging from diapause.  
1124 As a consequence, there may be insufficient top-down control on the spring  
1125 phytoplankton bloom, thought to be one of the key mechanisms controlling  
1126 bloom timing (Banse, 2013).

1127 Second, some key phytoplankton and zooplankton functional groups are  
1128 absent from the model. Calcifying phytoplankton are a key functional group  
1129 important in the carbon cycle, producing more than half of the marine car-  
1130 bonate flux (Schiebel, 2002). Although MARBL-SPECTRA accounts for this  
1131 group implicitly, the inclusion of explicit calcifiers could improve the spatial  
1132 and temporal representation of calcium carbonate production, as well as  
1133 incorporate key carbon fertilization mechanisms thought to buffer coccol-  
1134 ithophore responses to climate change (Krumhardt et al., 2017, 2019). In  
1135 addition, phytoplankton dimethyl sulfide (DMS)-producers influence the at-  
1136 mospheric sulfur cycle by producing dimethylsulfoniopropionate (DMSP) and  
1137 convert it into DMS using an extracellular enzyme (DMSP-lyase) (Stefels  
1138 et al., 1995). *Phaeocystisantarctica* is especially important in the South-  
1139 ern Ocean, where it has been observed to dominate the community during  
1140 blooms (Alvain et al., 2008). The high prevalence in *Phaeocystis* blooms  
1141 make it an important contributor to primary production and biogeochemical  
1142 cycles where it occurs. The explicit incorporation of gelatinous zooplank-  
1143 ton, such as *Cnidarian* jellyfish and *salps*, could improve the representation  
1144 of top-down control on prey and the representation of carbon transfer effi-

1145 ciency to depth (Luo et al., 2020). The ability of multiphagous gelatinous  
1146 zooplankton to feed across a wide spectrum of size classes would provide an  
1147 indirect route of carbon flux by which even small phytoplankton biomass can  
1148 be transferred to the deep ocean.

1149 Third, our model does not include zooplankton vertical migration, the ac-  
1150 tive transport of organic carbon to depth by zooplankton consuming organic  
1151 particles at the surface during the night and respiring the inorganic nutri-  
1152 ents below the mixed layer during the day (Steinberg et al., 2000; Longhurst  
1153 and Harrison, 1988). While the global inventory of carbon export is con-  
1154 strained in models by ocean circulation and the upward flux of nutrients  
1155 driving new production, zooplankton diel vertical migration could be an im-  
1156 portant component in mesopelagic zones, contributing significantly to oxygen  
1157 consumption, particularly at oxygen minimum zones, and carbon export into  
1158 the ocean interior (Bianchi et al., 2013; Aumont et al., 2018).

1159 Fourth, MARBL-SPECTRA does not represent mixotrophy. Mixotrophs  
1160 combine the autotrophic use of light and inorganic resources with the het-  
1161 erotrophic ingestion of prey. The incorporation of mixotrophy in ecological  
1162 models enhances the transfer of biomass to larger organisms at higher trophic  
1163 levels, which in turn increases the efficiency of oceanic carbon storage through  
1164 the production of larger, faster-sinking, and carbon-enriched organic detri-  
1165 tus (Ward and Follows, 2016). The exclusion of mixotrophy decreases the  
1166 production of larger phytoplankton, because the nutrient affinity of plankton  
1167 decreases with increasing organism size  $2$ . The highly efficient uptake of the  
1168 small phytoplankton leaves insufficient nutrients to support photosynthesis  
1169 in the larger groups, especially the mixed phytoplankton group.

1170 Fifth, MARBL-SPECTRA does not include an explicit representation  
1171 of higher trophic levels (fish, carnivorous jellies, etc.). Zooplankton losses  
1172 to consumption by higher predators are implicitly modelled using a squared  
1173 mortality term, which has a tendency to stabilize food webs (Edwards, 2001).  
1174 Feedbacks between the higher trophic level predator and zooplankton are not  
1175 resolved. One implication of this simplification is that the ecosystem effects  
1176 of fishing, for example, cannot be resolved by MARBL-SPECTRA.

1177 Lastly, bacterial activity is not explicitly modeled in our ecosystem model.  
1178 The effect of the microbial loop is included through constant degradation  
1179 rates of bacterial remineralization. That is, mortality and exudation losses  
1180 are recycled to inorganic nutrients via constant rate degradation of several  
1181 pools of organic matter (dissolved and particulate) for each essential element.  
1182 Modelling bacterial activity explicitly would increase the model's realism at

1183 capturing the microbial food web dynamics, but it should not significantly  
1184 change our results because bacterial abundances are generally more stable  
1185 than phytoplankton abundances seasonally in open-ocean waters (Spitz et al.,  
1186 2001).

#### 1187 *4.3. Outlook*

1188 Plankton community models embedded in ocean biogeochemical and cir-  
1189 culation models are powerful tools for examining how organism traits shape  
1190 species biogeography, interactions within plankton communities, the impacts  
1191 of environmental changes on marine ecosystems, and feedbacks between ecosys-  
1192 tems and biogeochemical cycles (e.g., Kwiatkowski et al., 2020; Follows et al.,  
1193 2007; Ward et al., 2012; Dutkiewicz et al., 2015b). Here, we have developed  
1194 and evaluated MARBL-SPECTRA, a trait-based plankton community model  
1195 that resolves nine phytoplankton sizes classes across four functional groups  
1196 and six zooplankton size classes, allowing for an enhanced understanding of  
1197 the underlying mechanisms regulating marine plankton biogeography, and  
1198 the community's role in biogeochemical cycles. Future increases in ocean  
1199 temperatures and other environmental properties are expected to modify  
1200 phytoplankton community diversity and distribution through a range of di-  
1201 rect and indirect pathways and mechanisms, many of which are simulated in  
1202 MARBL-SPECTRA. The future incorporation of MARBL-SPECTRA in a  
1203 fully coupled climate model would allow for the projection of model organ-  
1204 ism fitness into the future to better predict changes in plankton communities  
1205 structure, biogeochemical cycles, food web dynamics, and air-sea fluxes of  
1206 climate-active gases.

## 1207 **5. Acknowledgements**

1208 We acknowledge high-performance computing support from Cheyenne  
1209 (doi:10.5065/D6RX99HX) provided by NCAR's Computational and Infor-  
1210 mation Systems Laboratory, sponsored by the National Science Foundation  
1211 (NSF). This manuscript is based upon work supported by the National Cen-  
1212 ter for Atmospheric Research, which is a major facility sponsored by the  
1213 National Science Foundation under Cooperative Agreement No. 1852977,  
1214 and the National Science Foundation Graduate Research Fellowship under  
1215 Grant No. (DGE-2038238 and DGE-1650112). Any opinions, findings, and  
1216 conclusions or recommendations expressed in this material are those of the  
1217 author(s) and do not necessarily reflect the views of the National Science

1218 Foundation. In addition to NSF funds to NCAR, MARBL development has  
1219 been supported by the Office of Biological & Environmental Research (BER)  
1220 within the Department of Energy (DOE) (DE-SC0012603). We also grate-  
1221 fully acknowledge comments from John Dunne and Charles Stock, which  
1222 improved a previous version of this manuscript.

## 1223 6. Supplementary Information

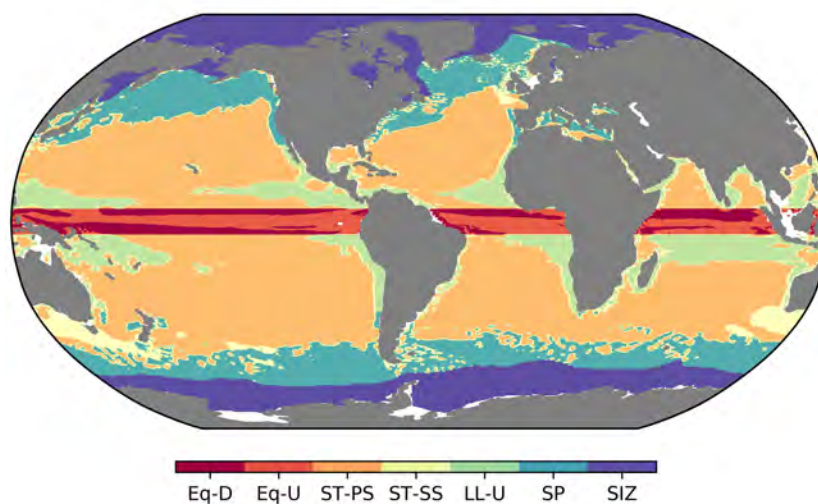

Figure S1: Biomes. Designated oceanic biomes, using Sarmiento et al. (2004): Equatorial downwelling (Eq-D), Equatorial upwelling (Eq-U), Subtropical permanently stratified (ST-PS), Subtropical seasonally stratified (ST-SS), Lower latitude upwelling (LL-U), Sub-polar seasonally stratified (SP), Seasonal ice-covered zone (SIZ). In the analyses, the northern and Southern Hemisphere biomes are separated

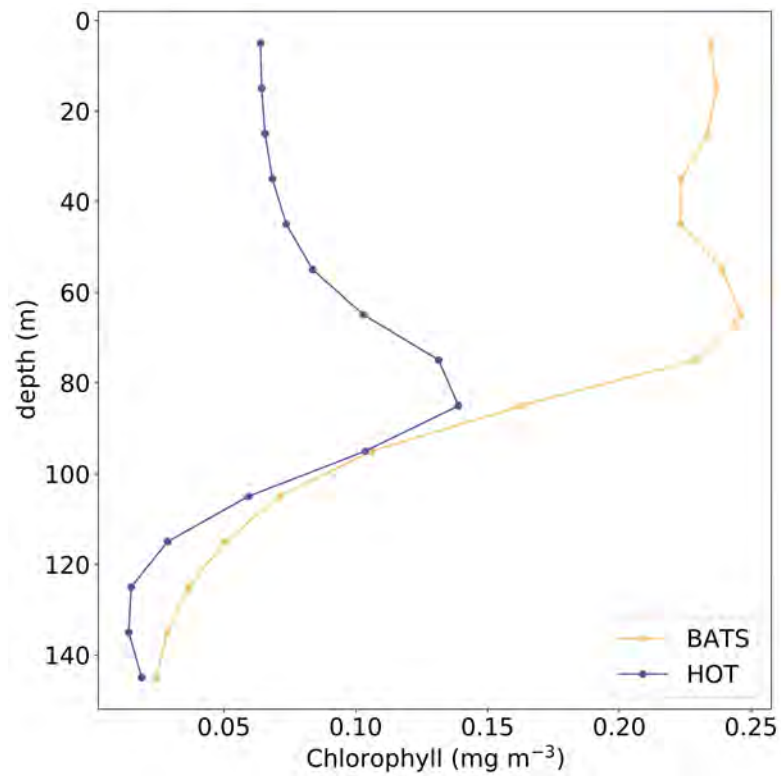

Figure S2: Modelled annual average chlorophyll ( $\text{mg m}^{-3}$ ) vertical profiles in the (a) BATS, and (b) HOT station over the period 1990 and 2009.

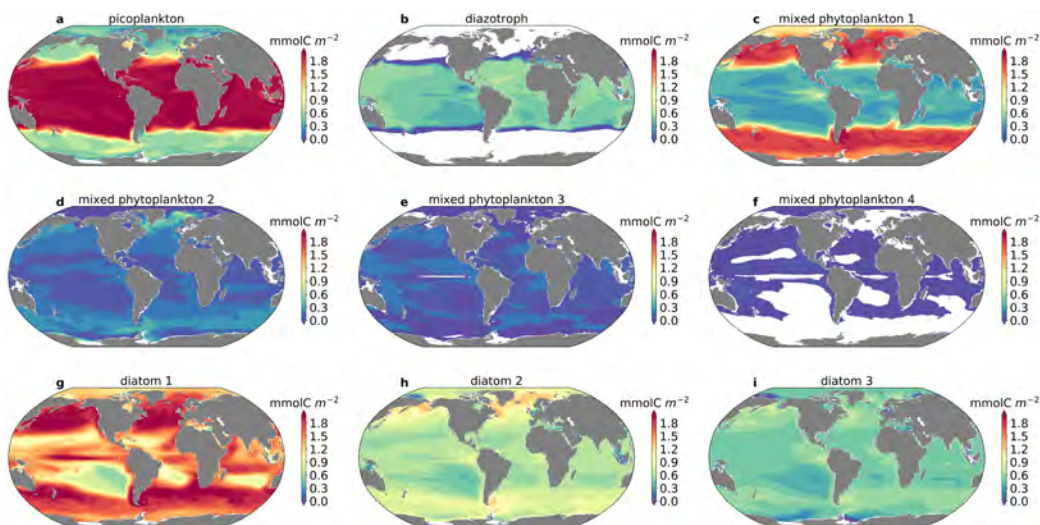

Figure S3: Phytoplankton biomass. Depth integrated average annual phytoplankton biomass for each phytoplankton type: (a) picoplankton (b) diazotrophs, (c) smallest mixed phytoplankton, (d) second smallest mixed phytoplankton, (e) second largest mixed phytoplankton, (f) largest mixed phytoplankton, (g) smallest diatom, (h) medium diatom and (i) largest diatom.

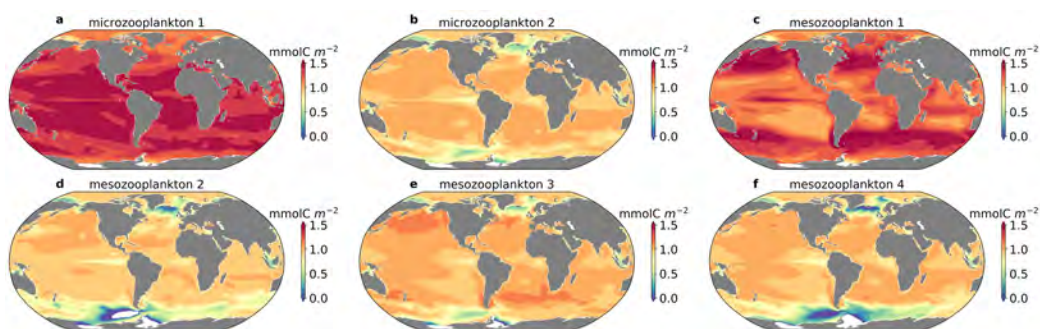

Figure S4: Zooplankton biomass. Depth integrated average annual zooplankton biomass for each zooplankton type: (a) smallest microzooplankton (microzooplankton 1) (b) largest microzooplankton (microzooplankton 2), (c) smallest mesozooplankton (mesozooplankton 1), (d) second smallest mesozooplankton (mesozooplankton 2), (e) medium mesozooplankton (mesozooplankton 3), and (f) largest mesozooplankton (mesozooplankton 4).



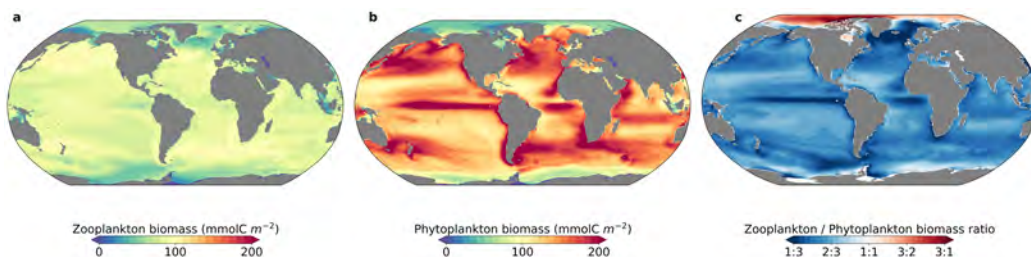

Figure S5: Depth integrated carbon biomass over 1990-2009 for (a) zooplankton ( $\text{mmol C m}^{-2}$ ) and (a) phytoplankton ( $\text{mmol C m}^{-2}$ ); (c) shows the ratio of depth-integrated zooplankton to phytoplankton biomass over 1990-2009.

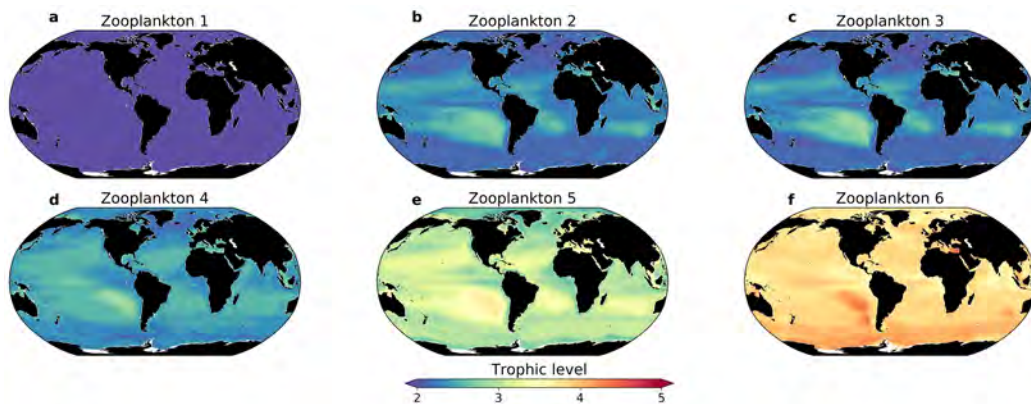

Figure S6: Zooplankton annual mean trophic level over the top 150 m between 1990 and 2009. (a) smallest microzooplankton (microzooplankton 1) (b) largest microzooplankton (microzooplankton 2), (c) smallest mesozooplankton (mesozooplankton 1), (d) second smallest mesozooplankton (mesozooplankton 2), (e) medium mesozooplankton (mesozooplankton 3), and (f) largest mesozooplankton (mesozooplankton 4).

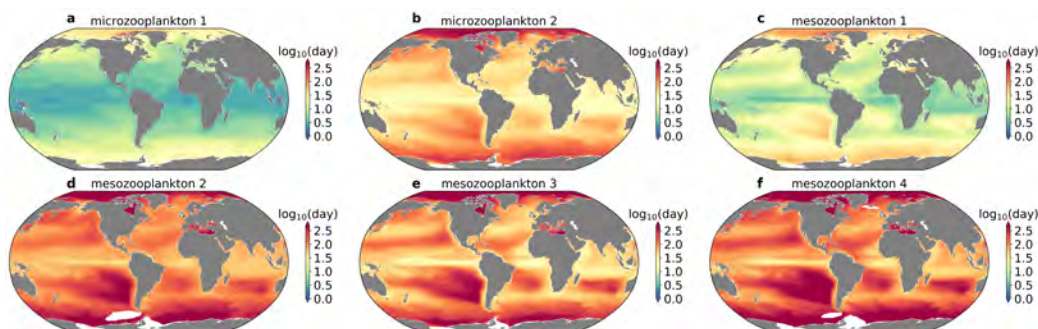

Figure S7: Zooplankton generation time. The average annual generation time is the zooplankton biomass divided by the zooplankton production at the top 150m for each zooplankton type: (a) smallest microzooplankton (microzooplankton 1) (b) largest microzooplankton (microzooplankton 2), (c) smallest mesozooplankton (mesozooplankton 1), (d) second smallest mesozooplankton (mesozooplankton 2), (e) medium mesozooplankton (mesozooplankton 3), and (f) largest mesozooplankton (mesozooplankton 4).

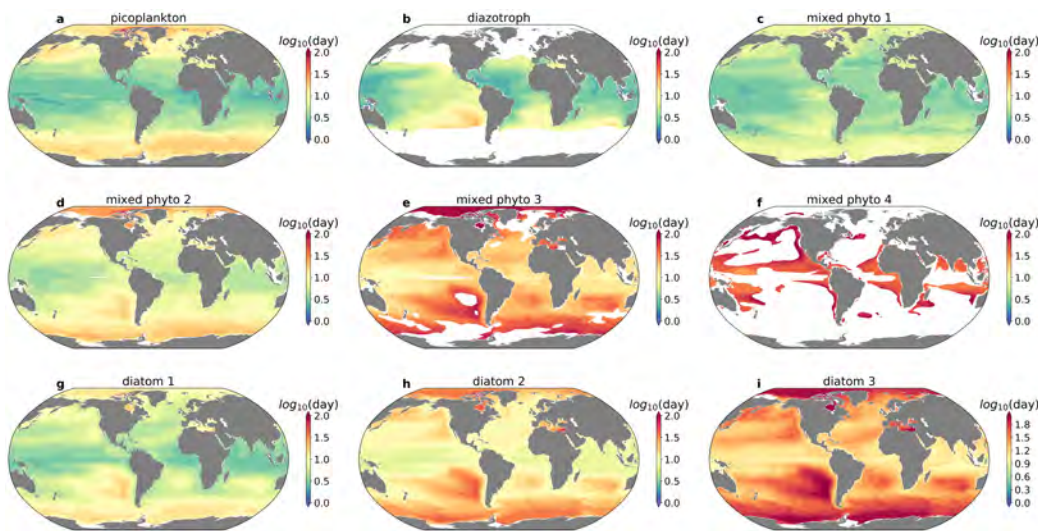

Figure S8: Phytoplankton generation time. The average annual generation time represents the phytoplankton biomass divided by the phytoplankton production at the top 150m for each phytoplankton type: (a) picoplankton (b) diazotrophs, (c) smallest mixed phytoplankton, (d) second smallest mixed phytoplankton, (e) second largest mixed phytoplankton, (f) largest mixed phytoplankton, (g) smallest diatom, (h) medium diatom and (i) largest diatom.

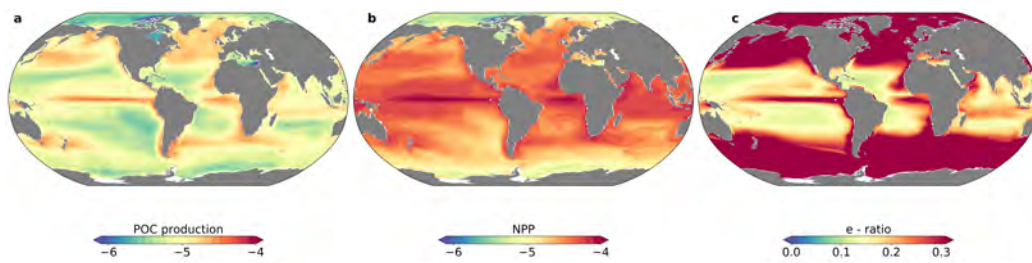

Figure S9: Annual mean  $\log_{10}$  POC production (a), annual mean  $\log_{10}$  NPP (b), and export ratio (e-ratio) (c) at the top 150m between 1990 and 2009.

1224 **References**

- 1225 Acevedo-Trejos, E., Brandt, G., Bruggeman, J., Merico, A., 2015. Mech-  
1226 anisms shaping size structure and functional diversity of phytoplankton  
1227 communities in the ocean. *Scientific reports* 5, 1–8.
- 1228 Aksnes, D.L., Egge, J.K., 1991. A theoretical model for nutrient uptake in  
1229 phytoplankton. *Marine ecology progress series*. Oldendorf 70, 65–72.
- 1230 Allen, A.P., Gillooly, J.F., Brown, J.H., 2005. Linking the global carbon  
1231 cycle to individual metabolism. *Functional Ecology* 19, 202–213.
- 1232 Aloisi, G., 2015. Covariation of metabolic rates and cell size in coccol-  
1233 ithophores. *Biogeosciences* 12, 4665–4692. doi:10.5194/bg-12-4665-2015.
- 1234 Alvain, S., Moulin, C., Dandonneau, Y., Loisel, H., 2008. Seasonal distribu-  
1235 tion and succession of dominant phytoplankton groups in the global ocean:  
1236 A satellite view. *Global Biogeochemical Cycles* 22.
- 1237 Anderson, L.A., Sarmiento, J.L., 1994. Redfield ratios of remineralization  
1238 determined by nutrient data analysis. *Global biogeochemical cycles* 8, 65–  
1239 80.
- 1240 Anderson, S., Barton, A., Clayton, S., Dutkiewicz, S., Rynearson, T., 2021.  
1241 Marine phytoplankton functional types exhibit diverse responses to ther-  
1242 mal change. *Nature communications* 12, 1–9.
- 1243 Armstrong, R.A., Lee, C., Hedges, J.I., Honjo, S., Wakeham, S.G., 2002. A  
1244 new, mechanistic model for organic carbon fluxes in the ocean based on the  
1245 quantitative association of poc with ballast minerals. *Deep-Sea Research*  
1246 II 49, 219–236.
- 1247 Arrhenius, S., 1915. *Quantitative laws in biological chemistry*. volume 1915.  
1248 G. Bell.
- 1249 Aumont, O., Éthé, C., Tagliabue, A., Bopp, L., Gehlen, M., 2015. *Pisces-*  
1250 *v2: an ocean biogeochemical model for carbon and ecosystem studies*.  
1251 *Geoscientific Model Development* 8, 2465–2513.
- 1252 Aumont, O., Maier-Reimer, E., Blain, S., Monfray, P., 2003. An ecosys-  
1253 tem model of the global ocean including fe, si, p colimitations. *Global*  
1254 *Biogeochemical Cycles* 17.

- 1255 Aumont, O., Maury, O., Lefort, S., Bopp, L., 2018. Evaluating the potential  
1256 impacts of the diurnal vertical migration by marine organisms on marine  
1257 biogeochemistry. *Global Biogeochemical Cycles* 32, 1622–1643.
- 1258 Azam, F., Fenchel, T., Field, J.G., Gray, J., Meyer-Reil, L., Thingstad, F.,  
1259 1983. The ecological role of water-column microbes in the sea. *Marine*  
1260 *ecology progress series* , 257–263.
- 1261 Banas, N.S., 2011. Adding complex trophic interactions to a size-spectral  
1262 plankton model: Emergent diversity patterns and limits on predictability.  
1263 *Ecological Modelling* 222, 2663–2675. doi:10.1016/j.ecolmodel.2011.05.018.
- 1264 Banse, K., 2013. Reflections about chance in my career, and on the top-down  
1265 regulated world. *Annual Review of Marine Science* 5, 1–19.
- 1266 Barnes, C., Bethea, D., Brodeur, R., Spitz, J., Ridoux, V., Pusineri, C.,  
1267 Chase, B., Hunsicker, M., Juanes, F., Kellermann, A., et al., 2008. Preda-  
1268 tor and prey body sizes in marine food webs: *Ecological archives* e089-051.  
1269 *Ecology* 89, 881–881.
- 1270 Barton, A.D., Dutkiewicz, S., Flierl, G., Bragg, J., Follows, M.J., 2010.  
1271 Patterns of diversity in marine phytoplankton. *Science* 327, 1509–1511.
- 1272 Barton, A.D., Pershing, A.J., Litchman, E., Record, N.R., Edwards, K.F.,  
1273 Finkel, Z.V., Kjørboe, T., Ward, B.A., 2013. The biogeography of marine  
1274 plankton traits. *Ecology letters* 16, 522–534.
- 1275 Bauermeister, A., Sargent, J., 1979. Wax esters: major metabolites in the  
1276 marine environment. *Trends in Biochemical Sciences* 4, 209–211.
- 1277 Baumgartner, M.F., Tarrant, A.M., 2017. The physiology and ecology of  
1278 diapause in marine copepods. *Annual Review of Marine Science* 9, 387–  
1279 411.
- 1280 Behrenfeld, M.J., 2014. Climate-mediated dance of the plankton. *Nature*  
1281 *Climate Change* 4, 880–887.
- 1282 Behrenfeld, M.J., Boss, E., 2003. The beam attenuation to chlorophyll ratio:  
1283 an optical index of phytoplankton physiology in the surface ocean? *Deep*  
1284 *Sea Research Part I: Oceanographic Research Papers* 50, 1537–1549.

- 1285 Behrenfeld, M.J., Boss, E., Siegel, D.A., Shea, D.M., 2005. Carbon-based  
1286 ocean productivity and phytoplankton physiology from space. *Global Bio-*  
1287 *geochemical Cycles* 19, 1–14. doi:10.1029/2004GB002299.
- 1288 Behrenfeld, M.J., Marañón, E., Siegel, D.A., Hooker, S.B., 2002. Photoac-  
1289 climation and nutrient-based model of light-saturated photosynthesis for  
1290 quantifying oceanic primary production. *Marine Ecology Progress Series*  
1291 228, 103–117.
- 1292 Bertilsson, S., Berglund, O., Karl, D.M., Chisholm, S.W., 2003. Elemental  
1293 composition of marine prochlorococcus and synechococcus: Implications  
1294 for the ecological stoichiometry of the sea. *Limnol. Oceanogr* 48, 1721–  
1295 1731.
- 1296 Beusen, A., Van Beek, L., Bouwman, A., Mogollón, J., Middelburg, J., 2015.  
1297 Coupling global models for hydrology and nutrient loading to simulate  
1298 nitrogen and phosphorus retention in surface water—description of image—  
1299 gnm and analysis of performance. *Geoscientific model development* 8,  
1300 4045–4067.
- 1301 Beusen, A.H., Bouwman, A.F., Van Beek, L.P., Mogollón, J.M., Middelburg,  
1302 J.J., 2016. Global riverine n and p transport to ocean increased during  
1303 the 20th century despite increased retention along the aquatic continuum.  
1304 *Biogeosciences* 13, 2441–2451.
- 1305 Bianchi, D., Galbraith, E.D., Carozza, D.A., Mislán, K., Stock, C.A., 2013.  
1306 Intensification of open-ocean oxygen depletion by vertically migrating an-  
1307 imals. *Nature Geoscience* 6, 545–548.
- 1308 Boyd, P., Trull, T., 2007. Understanding the export of biogenic particles  
1309 in oceanic waters: Is there consensus? *Progress in Oceanography* 72,  
1310 276–312.
- 1311 Boyd, P.W., Strzepek, R., Fu, F., Hutchins, D.A., 2010. Environmental  
1312 control of open-ocean phytoplankton groups: Now and in the future. *Lim-*  
1313 *nology and Oceanography* 55, 1353–1376.
- 1314 Breitbarth, E., Wohlers, J., Kläs, J., LaRoche, J., Peeken, I., 2008. Nitrogen  
1315 fixation and growth rates of trichodesmium ims-101 as a function of light  
1316 intensity. *Marine Ecology Progress Series* 359, 25–36.

- 1317 Bruggeman, J., Kooijman, S.A., 2007. A biodiversity-inspired approach to  
1318 aquatic ecosystem modeling. *Limnology and Oceanography* 52, 1533–1544.
- 1319 Carlotti, F., Giske, J., Werner, F., 2000. Modeling zooplankton dynamics,  
1320 in: *ICES zooplankton methodology manual*. Elsevier, pp. 571–667.
- 1321 Carr, M.E., Friedrichs, M.A., Schmeltz, M., Aita, M.N., Antoine, D., Arrigo,  
1322 K.R., Asanuma, I., Aumont, O., Barber, R., Behrenfeld, M., Bidigare,  
1323 R., Buitenhuis, E.T., Campbell, J., Ciotti, A., Dierssen, H., Dowell, M.,  
1324 Dunne, J., Esaias, W., Gentili, B., Gregg, W., Groom, S., Hoepffner, N.,  
1325 Ishizaka, J., Kameda, T., Quéré, C.L., Lohrenz, S., Marra, J., Mélin, F.,  
1326 Moore, K., Morel, A., Reddy, T.E., Ryan, J., Scardi, M., Smyth, T.,  
1327 Turpie, K., Tilstone, G., Waters, K., Yamanaka, Y., 2006. A comparison  
1328 of global estimates of marine primary production from ocean color.  
1329 *Deep-Sea Research Part II: Topical Studies in Oceanography* 53, 741–770.  
1330 doi:10.1016/j.dsr2.2006.01.028.
- 1331 Cermeño, P., Marañón, E., Harbour, D., Harris, R.P., 2006. Invariant scaling  
1332 of phytoplankton abundance and cell size in contrasting marine environ-  
1333 ments. *Ecology letters* 9, 1210–1215.
- 1334 Chen, B., Liu, H., Huang, B., Wang, J., 2014. Temperature effects on the  
1335 growth rate of marine picoplankton. *Marine Ecology Progress Series* 505,  
1336 37–47. doi:10.3354/meps10773.
- 1337 Chisholm, S.W., 1992. Phytoplankton size.
- 1338 Cohen, J.E., Pimm, S.L., Yodzis, P., Saldaña, J., 1993. Body sizes of animal  
1339 predators and animal prey in food webs. *Journal of animal ecology* , 67–78.
- 1340 Conley, K.R., Lombard, F., Sutherland, K.R., 2018. Mammoth grazers on  
1341 the ocean’s minuteness: a review of selective feeding using mucous meshes.  
1342 *Proceedings of the Royal Society B: Biological Sciences* 285, 20180056.
- 1343 Cullen, J.J., MacIntyre, J.G., 1998. Behavior, physiology and the niche of  
1344 depth-regulating phytoplankton. *Nato Asi Series G Ecological Sciences* 41,  
1345 559–580.
- 1346 Danabasoglu, G., Bates, S.C., Briegleb, B.P., Jayne, S.R., Jochum, M.,  
1347 Large, W.G., Peacock, S., Yeager, S.G., 2012. The cesm4 ocean com-  
1348 ponent. *Journal of Climate* 25, 1361–1389.

- 1349 DeVries, T., Weber, T., 2017. The export and fate of organic matter in the  
1350 ocean: New constraints from combining satellite and oceanographic tracer  
1351 observations. *Global Biogeochemical Cycles* 31, 535–555.
- 1352 Dunne, J.P., Sarmiento, J.L., Gnanadesikan, A., 2007. A synthesis of  
1353 global particle export from the surface ocean and cycling through the  
1354 ocean interior and on the seafloor. *Global Biogeochemical Cycles* 21.  
1355 doi:10.1029/2006GB002907.
- 1356 Dutkiewicz, S., Cermeno, P., Jahn, O., Follows, M., Hickman, A., Taniguchi,  
1357 D., Ward, B., 2019. Dimensions of marine phytoplankton diversity. *Biogeo-*  
1358 *sciences Discussions* , 1–46doi:10.5194/bg-2019-311.
- 1359 Dutkiewicz, S., Hickman, A.E., Jahn, O., Gregg, W.W., Mouw, C.B., Fol-  
1360 lows, M.J., 2015a. Capturing optically important constituents and proper-  
1361 ties in a marine biogeochemical and ecosystem model. *Biogeosciences* 12,  
1362 4447–4481. doi:10.5194/bg-12-4447-2015.
- 1363 Dutkiewicz, S., Morris, J.J., Follows, M.J., Scott, J., Levitan, O., Dyhrman,  
1364 S.T., Berman-Frank, I., 2015b. Impact of ocean acidification on the struc-  
1365 ture of future phytoplankton communities. *Nature Climate Change* 5,  
1366 1002–1006. doi:10.1038/nclimate2722.
- 1367 Edwards, A.M., 2001. Adding detritus to a nutrient–phytoplankton–  
1368 zooplankton model: a dynamical-systems approach. *Journal of Plankton*  
1369 *Research* 23, 389–413.
- 1370 Edwards, K.F., Klausmeier, C.A., Litchman, E., 2015a. Nutrient utilization  
1371 traits of phytoplankton ecological archives e096-202. *Data Papers Ecology*  
1372 96, 2311. URL: <http://esapubs.org/archive>.
- 1373 Edwards, K.F., Thomas, M.K., Klausmeier, C.A., Litchman, E., 2012. Al-  
1374 lometric scaling and taxonomic variation in nutrient utilization traits and  
1375 maximum growth rate of phytoplankton. *Limnology and Oceanography*  
1376 57, 554–566. doi:10.4319/lo.2012.57.2.0554.
- 1377 Edwards, K.F., Thomas, M.K., Klausmeier, C.A., Litchman, E., 2015b. Light  
1378 and growth in marine phytoplankton: Allometric, taxonomic, and envi-  
1379 ronmental variation. *Limnology and Oceanography* 60, 540–552. doi:doi:  
1380 10.1002/lno.10033.



- 1381 Eppley, R.W., 1972. Temperature and phytoplankton growth in the sea.  
1382 Fish. bull 70, 1063–1085.
- 1383 Eppley, R.W., Rogers, J.N., McCarthy, J.J., 1969. Half-saturation constants  
1384 for uptake of nitrate and ammonium by marine phytoplankton. Limnology  
1385 and oceanography 14, 912–920.
- 1386 Evans, G.T., Parslow, J.S., 1985. A model of annual plankton cycles. Bio-  
1387 logical oceanography 3, 327–347.
- 1388 Falcón, L.I., Pluvinage, S., Carpenter, E.J., 2005. Growth kinetics of marine  
1389 unicellular n<sub>2</sub>-fixing cyanobacterial isolates in continuous culture in rela-  
1390 tion to phosphorus and temperature. Marine Ecology Progress Series 285,  
1391 3–9.
- 1392 Falkowski, P.G., Dubinsky, Z., Wyman, K., 1985. Growth-irradiance  
1393 relationships in phytoplankton'. Limnol. Oceanogr 30, 311–321.
- 1394 Fasham, M.J., Ducklow, H.W., McKelvie, S.M., 1990. A nitrogen-based  
1395 model of plankton dynamics in the oceanic mixed layer. Journal of Marine  
1396 Research 48, 591–639.
- 1397 Field, C.B., Behrenfeld, M.J., Randerson, J.T., Falkowski, P., 1998. Primary  
1398 production of the biosphere: integrating terrestrial and oceanic compo-  
1399 nents. science 281, 237–240.
- 1400 Finkel, Z.V., 2001. Light absorption and size scaling of light-limited  
1401 metabolism in marine diatoms. Limnology and oceanography 46, 86–94.
- 1402 Finkel, Z.V., Beardall, J., Flynn, K.J., Quigg, A., Rees, T.A.V., Raven,  
1403 J.A., 2010. Phytoplankton in a changing world: Cell size and el-  
1404 elemental stoichiometry. Journal of Plankton Research 32, 119–137.  
1405 doi:10.1093/plankt/fbp098.
- 1406 Follows, M.J., Dutkiewicz, S., Grant, S., Chisholm, S.W., 2007. Emergent  
1407 biogeography of microbial communities in a model ocean. Science 315,  
1408 1843–1846. doi:10.1126/science.1138544.
- 1409 Franks, P.J., 2002. Npz models of plankton dynamics: their construction,  
1410 coupling to physics, and application. Journal of Oceanography 58, 379–  
1411 387.

- 1412 Fu, F.X., Zhang, Y., Bell, P.R., Hutchins, D.A., 2005. Phosphate uptake and  
1413 growth kinetics of trichodesmium (cyanobacteria) isolates from the north  
1414 atlantic ocean and the great barrier reef, australia 1. *Journal of Phycology*  
1415 41, 62–73.
- 1416 Fuchs, H.L., Franks, P.J., 2010. Plankton community properties determined  
1417 by nutrients and size-selective feeding. *Marine Ecology Progress Series*  
1418 413, 1–15. doi:10.3354/meps08716.
- 1419 Galbraith, E.D., Martiny, A.C., 2015. A simple nutrient-dependence mech-  
1420 anism for predicting the stoichiometry of marine ecosystems. *Proceedings*  
1421 *of the National Academy of Sciences of the United States of America* 112,  
1422 8199–8204. doi:10.1073/pnas.1423917112.
- 1423 Garcia, H., Boyer, T., Baranova, O., Locarnini, R., Mishonov, A., Grodsky,  
1424 A., Paver, C., Weathers, K., Smolyar, I., Reagan, J., et al., 2019. World  
1425 ocean atlas 2018: Product documentation. A. Mishonov, Technical Editor  
1426 .
- 1427 Gasol, J.M., Del Giorgio, P.A., Duarte, C.M., 1997. Biomass distribution in  
1428 marine planktonic communities. *Limnology and Oceanography* 42, 1353–  
1429 1363.
- 1430 Geider, R.J., MacIntyre, H.L., Kana, T.M., 1997. Dynamic model of phyto-  
1431 plankton growth and acclimation: responses of the balanced growth rate  
1432 and the chlorophyll a: carbon ratio to light, nutrient-limitation and tem-  
1433 perature. *Marine Ecology Progress Series* 148, 187–200.
- 1434 Geider, R.J., MacIntyre, H.L., Kana, T.M., 1998. A dynamic regula-  
1435 tory model of phytoplanktonic acclimation to light, nutrients, and  
1436 temperature. *Limnology and Oceanography* 43, 679–694. URL:  
1437 <https://aslopubs.onlinelibrary.wiley.com/doi/abs/10.4319/lo.1998.43.4.0679>,  
1438 doi:<https://doi.org/10.4319/lo.1998.43.4.0679>.
- 1439 Geider, R.J., Osbonie, B.A., Raven, J.A., 1986. Growth, photosynthesis and  
1440 maintenance metabolic cost in the diatom phaeodactylum tricornutum at  
1441 very low light levels 1. *Journal of Phycology* 22, 39–48.
- 1442 Gent, P.R., Danabasoglu, G., Donner, L.J., Holland, M.M., Hunke, E.C.,  
1443 Jayne, S.R., Lawrence, D.M., Neale, R.B., Rasch, P.J., Vertenstein, M.,

- 1444 2011. The community climate system model version 4. *Journal of climate*  
1445 24, 4973–4991.
- 1446 Gillooly, J.F., 2000. Effect of body size and temperature on generation time  
1447 in zooplankton. *Journal of plankton research* 22, 241–251.
- 1448 Gillooly, J.F., Brown, J.H., West, G.B., Savage, V.M., Charnov, E.L., 2001.  
1449 Effects of size and temperature on metabolic rate. *science* 293, 2248–2251.
- 1450 Gillooly, J.F., Charnov, E.L., West, G.B., Savage, V.M., Brown, J.H., 2002.  
1451 Effects of size and temperature on developmental time. *Nature* 417, 70–73.
- 1452 Griffies, S.M., Biastoch, A., Böning, C., Bryan, F., Danabasoglu, G., Chas-  
1453 signet, E.P., England, M.H., Gerdes, R., Haak, H., Hallberg, R.W., et al.,  
1454 2009. Coordinated ocean-ice reference experiments (cores). *Ocean mod-  
1455 elling* 26, 1–46.
- 1456 Großkopf, T., Mohr, W., Baustian, T., Schunck, H., Gill, D.,  
1457 Kuypers, M.M.M., Lavik, G., Schmitz, R.A., Wallace, D.W.R.,  
1458 LaRoche, J., 2012. Doubling of marine dinitrogen-fixation rates  
1459 based on direct measurements. *Nature* 488, 361–364. URL:  
1460 <https://doi.org/10.1038/nature11338>, doi:10.1038/nature11338.
- 1461 Guidi, L., Stemann, L., Jackson, G.A., Ibanez, F., Claustre, H., Legendre,  
1462 L., Picheral, M., Gorsky, G., 2009. Effects of phytoplankton commu-  
1463 nity on production, size, and export of large aggregates: A world-ocean  
1464 analysis. *Limnology and Oceanography* 54, 1951–1963.
- 1465 Hairston Jr, N.G., Munns Jr, W.R., 1984. The timing of copepod diapause as  
1466 an evolutionarily stable strategy. *The American Naturalist* 123, 733–751.
- 1467 Hansen, B., Bjornsen, P.K., Hansen, P.J., 1994. The size ratio between  
1468 planktonic predators and their prey. *Limnology and Oceanography* 39,  
1469 395–403. doi:10.4319/lo.1994.39.2.0395.
- 1470 Hansen, P.J., Bjørnsen, P.K., Hansen, B.W., 1997. Zooplankton grazing  
1471 and growth: Scaling within the 2-2,- $\mu$ m body size range. *Limnology and  
1472 oceanography* 42, 687–704.
- 1473 Hartmann, M., Gomez-Pereira, P., Grob, C., Ostrowski, M., Scanlan, D.J.,  
1474 Zubkov, M.V., 2014. Efficient co2 fixation by surface prochlorococcus in  
1475 the atlantic ocean. *ISME Journal* 8, 2280–2289. doi:10.1038/ismej.2014.56.

- 1476 Hatton, I.A., McCann, K.S., Fryxell, J.M., Davies, T.J., Smerlak, M., Sin-  
1477 clair, A.R., Loreau, M., 2015. The predator-prey power law: Biomass  
1478 scaling across terrestrial and aquatic biomes. *Science* 349.
- 1479 Heneghan, R.F., Everett, J.D., Sykes, P., Batten, S.D., Edwards, M., Taka-  
1480 hashi, K., Suthers, I.M., Blanchard, J.L., Richardson, A.J., 2020. A func-  
1481 tional size-spectrum model of the global marine ecosystem that resolves  
1482 zooplankton composition. *Ecological Modelling* 435, 109265.
- 1483 Henson, S.A., Sanders, R., Madsen, E., 2012. Global patterns in efficiency of  
1484 particulate organic carbon export and transfer to the deep ocean. *Global*  
1485 *Biogeochemical Cycles* 26.
- 1486 Hirata, T., Hardman-Mountford, N., Brewin, R., Aiken, J., Barlow, R.,  
1487 Suzuki, K., Isada, T., Howell, E., Hashioka, T., Noguchi-Aita, M., et al.,  
1488 2011. Synoptic relationships between surface chlorophyll-a and diagnos-  
1489 tic pigments specific to phytoplankton functional types. *Biogeosciences* 8,  
1490 311–327.
- 1491 Hirche, H.J., 1997. Life cycle of the copepod calanus hyperboreus in the  
1492 greenland sea. *Marine Biology* 128, 607–618.
- 1493 Huete-Ortega, M., Cermeno, P., Calvo-Díaz, A., Maranon, E., 2012. Iso-  
1494 metric size-scaling of metabolic rate and the size abundance distribution  
1495 of phytoplankton. *Proceedings of the Royal Society B: Biological Sciences*  
1496 279, 1815–1823.
- 1497 Hunke, E., Lipscomb, W., Jones, P., Turner, A., Jeffery, N., Elliott,  
1498 S., 2017. Cice, the los alamos sea ice model, version 00. URL:  
1499 <https://www.osti.gov/biblio/1364126>.
- 1500 Irigoien, X., Huisman, J., Harris, R.P., 2004. Global biodiversity patterns of  
1501 marine phytoplankton and zooplankton. *Nature* 429, 863–867.
- 1502 Johnson, Z.I., Zinser, E.R., Coe, A., McNulty, N.P., Woodward, E.M.S.,  
1503 Chisholm, S.W., 2006. Niche partitioning among prochlorococcus ecotypes  
1504 along ocean-scale environmental gradients. *Science* 311, 1737–1740.
- 1505 Kiørboe, T., 1993. Turbulence, phytoplankton cell size, and the structure of  
1506 pelagic food webs. *Advances in marine biology* 29, 1–72.

- 1507 Kjørboe, T., 2011. How zooplankton feed: mechanisms, traits and trade-offs.  
1508 *Biological reviews* 86, 311–339.
- 1509 Kirk, J., 1976. A theoretical analysis of the contribution of algal cells to the  
1510 attenuation of light within natural waters: Iii. cylindrical and spheroidal  
1511 cells. *New Phytologist* 77, 341–358.
- 1512 Kirk, J.T., 1994. *Light and photosynthesis in aquatic ecosystems*. Cambridge  
1513 university press.
- 1514 Kjørboe, T., Hirst, A.G., 2014. Shifts in mass scaling of respiration, feeding,  
1515 and growth rates across life-form transitions in marine pelagic organisms.  
1516 *American Naturalist* 183. doi:10.1086/675241.
- 1517 Kremer, C.T., Thomas, M.K., Litchman, E., 2017. Temperature- and size-  
1518 scaling of phytoplankton population growth rates: Reconciling the eppley  
1519 curve and the metabolic theory of ecology. *Limnology and Oceanography*  
1520 62, 1658–1670. doi:10.1002/lno.10523.
- 1521 Krumhardt, K.M., Lovenduski, N.S., Iglesias-Rodriguez, M.D., Kleypas,  
1522 J.A., 2017. Coccolithophore growth and calcification in a changing ocean.  
1523 *Progress in oceanography* 159, 276–295.
- 1524 Krumhardt, K.M., Lovenduski, N.S., Long, M.C., Levy, M., Lindsay, K.,  
1525 Moore, J.K., Nissen, C., 2019. Coccolithophore growth and calcification  
1526 in an acidified ocean: Insights from community earth system model simu-  
1527 lations. *Journal of Advances in Modeling Earth Systems* 11, 1418–1437.
- 1528 Kwiatkowski, L., Torres, O., Bopp, L., Aumont, O., Chamberlain, M., Chris-  
1529 tian, J.R., Dunne, J.P., Gehlen, M., Ilyina, T., John, J.G., et al., 2020.  
1530 Twenty-first century ocean warming, acidification, deoxygenation, and  
1531 upper-ocean nutrient and primary production decline from cmip6 model  
1532 projections. *Biogeosciences* 17, 3439–3470.
- 1533 Landry, M.R., Al-Mutairi, H., Selph, K.E., Christensen, S., Nunnery, S.,  
1534 2001. Seasonal patterns of mesozooplankton abundance and biomass at  
1535 station aloha. *Deep Sea Research Part II: Topical Studies in Oceanography*  
1536 48, 2037–2061.
- 1537 Landry, M.R., Calbet, A., 2004. Microzooplankton production in the oceans.  
1538 *ICES Journal of Marine Science* 61, 501–507.

- 1539 Large, W.G., Yeager, S.G., 2009. The global climatology of an interan-  
1540 nually varying air - sea flux data set. *Climate Dynamics* 33, 341–364.  
1541 doi:10.1007/s00382-008-0441-3.
- 1542 Law, R., Plank, M.J., James, A., Blanchard, J.L., 2009. Size-spectra dy-  
1543 namics from stochastic predation and growth of individuals. *Ecology* 90,  
1544 802–811.
- 1545 Legendre, L., Le Fèvre, J., 1995. Microbial food webs and the export of  
1546 biogenic carbon in oceans. *Aquatic Microbial Ecology* 9, 69–77.
- 1547 Legendre, L., Rassoulzadegan, F., 1996. Food-web mediated export of bio-  
1548 genic carbon in oceans: hydrodynamic control. *Marine Ecology Progress*  
1549 *Series* 145, 179–193.
- 1550 Letelier, R.M., Karl, D.M., 1998. *Trichodesmium* spp. physiology and nutri-  
1551 ent fluxes in the north pacific subtropical gyre. *Aquatic Microbial Ecology*  
1552 15, 265–276.
- 1553 Letelier, R.M., Karl, D.M., Abbott, M.R., Bidigare, R.R., 2004. Light driven  
1554 seasonal patterns of chlorophyll and nitrate in the lower euphotic zone of  
1555 the north pacific subtropical gyre. *Limnology and Oceanography* 49, 508–  
1556 519.
- 1557 Letscher, R.T., Moore, J.K., 2015. Preferential remineralization of dissolved  
1558 organic phosphorus and non-redfield dom dynamics in the global ocean:  
1559 Impacts on marine productivity, nitrogen fixation, and carbon export.  
1560 *Global Biogeochemical Cycles* 29, 325–340.
- 1561 Letscher, R.T., Moore, J.K., Teng, Y.C., Primeau, F., 2015. Variable c: N: P  
1562 stoichiometry of dissolved organic matter cycling in the community earth  
1563 system model. *Biogeosciences* 12, 209–221.
- 1564 Li, Q.P., Franks, P.J., Landry, M.R., Goericke, R., Taylor, A.G., 2010. Mod-  
1565 eling phytoplankton growth rates and chlorophyll to carbon ratios in cal-  
1566 ifornia coastal and pelagic ecosystems. *Journal of Geophysical Research:*  
1567 *Biogeosciences* 115. doi:10.1029/2009JG001111.
- 1568 Litchman, E., 1998. Population and community responses of phytoplankton  
1569 to fluctuating light. *Oecologia* 117, 247–257.

- 1570 Litchman, E., Klausmeier, C.A., Schofield, O.M., Falkowski, P.G., 2007. The  
1571 role of functional traits and trade-offs in structuring phytoplankton com-  
1572 munities: Scaling from cellular to ecosystem level. *Ecology Letters* 10,  
1573 1170–1181. doi:10.1111/j.1461-0248.2007.01117.x.
- 1574 Long, M.C., Lindsay, K., Holland, M.M., 2015. Modeling photosynthesis in  
1575 sea ice-covered waters. *Journal of Advances in Modeling Earth Systems* 7,  
1576 1189–1206.
- 1577 Long, M.C., Moore, J.K., Lindsay, K., Levy, M.N., Doney, S.C., Luo, J.Y.,  
1578 Krumhardt, K.M., Letscher, R.T., Grover, M., Sylvester, Z.T., 2021. Sim-  
1579 ulations with the marine biogeochemistry library (marbl) .
- 1580 Longhurst, A.R., Harrison, W.G., 1988. Vertical nitrogen flux from the  
1581 oceanic photic zone by diel migrant zooplankton and nekton. *Deep Sea*  
1582 *Research Part A. Oceanographic Research Papers* 35, 881–889.
- 1583 López-Sandoval, D.C., Rodríguez-Ramos, T., Cermeño, P., Sobrino, C.,  
1584 Marañón, E., 2014. Photosynthesis and respiration in marine phytoplank-  
1585 ton: relationship with cell size, taxonomic affiliation, and growth phase.  
1586 *Journal of experimental marine biology and ecology* 457, 151–159.
- 1587 Luo, J.Y., Condon, R.H., Stock, C.A., Duarte, C.M., Lucas, C.H., Pitt,  
1588 K.A., Cowen, R.K., 2020. Gelatinous zooplankton-mediated carbon flows  
1589 in the global oceans: a data-driven modeling study. *Global Biogeochemical*  
1590 *Cycles* 34, e2020GB006704.
- 1591 Luo, Y.W., Lima, I.D., Karl, D.M., Deutsch, C., Doney, S., 2014. Data-based  
1592 assessment of environmental controls on global marine nitrogen fixation.  
1593 *Biogeosciences* 11, 691–708.
- 1594 Ángel López-Urrutia, Martin, E.S., Harris, R.P., Irigoien, X., 2006. Scaling  
1595 the metabolic balance of the oceans. *Proceedings of the National Academy*  
1596 *of Sciences* 103, 8739–8744.
- 1597 MacIntyre, S., 1998. Turbulent mixing and re-  
1598 source supply to phytoplankton. URL:  
1599 <https://agupubs.onlinelibrary.wiley.com/doi/abs/10.1029/CE054p0561>,  
1600 doi:<https://doi.org/10.1029/CE054p0561>.

- 1601 Marañón, E., Cermeño, P., López-Sandoval, D.C., Rodríguez-Ramos, T., So-  
1602 brino, C., Huete-Ortega, M., Blanco, J.M., Rodríguez, J., 2013. Unimodal  
1603 size scaling of phytoplankton growth and the size dependence of nutrient  
1604 uptake and use. *Ecology Letters* 16, 371–379. doi:10.1111/ele.12052.
- 1605 Margalef, R., 1978. Life-forms of phytoplankton as survival alternatives in  
1606 an unstable environment. *Oceanologica acta* 1, 493–509.
- 1607 Marquet, P.A., Quiñones, R.A., Abades, S., Labra, F., Tognelli, M., Arim,  
1608 M., Rivadeneira, M., 2005. Scaling and power-laws in ecological systems.  
1609 *Journal of Experimental Biology* 208, 1749–1769.
- 1610 Mayorga, E., Seitzinger, S.P., Harrison, J.A., Dumont, E., Beusen, A.H.,  
1611 Bouwman, A., Fekete, B.M., Kroeze, C., Van Drecht, G., 2010. Global  
1612 nutrient export from watersheds 2 (news 2): model development and im-  
1613 plementation. *Environmental Modelling & Software* 25, 837–853.
- 1614 McCarthy, J.J., Carpenter, E.J., 1979. *Oscillatoria* (trichodesmium) *thiebau-*  
1615 *tii* (cyanophyta) in the central north atlantic ocean 1 2. *Journal of Phy-*  
1616 *cology* 15, 75–82.
- 1617 Menden-Deuer, S., Lessard, E.J., 2000. Carbon to volume relationships for  
1618 dinoflagellates, diatoms, and other protist plankton. *Limnol. Oceanogr* 45,  
1619 569–579.
- 1620 Moeller, H.V., Laufkötter, C., Sweeney, E.M., Johnson, M.D., 2019. Light-  
1621 dependent grazing can drive formation and deepening of deep chlorophyll  
1622 maxima. *Nature communications* 10, 1–8.
- 1623 Monteiro, F.M., Dutkiewicz, S., Follows, M.J., 2011. Biogeographical con-  
1624 trols on the marine nitrogen fixers. *Global Biogeochemical Cycles* 25.
- 1625 Moore, C.M., Mills, M.M., Arrigo, K.R., Berman-Frank, I., Bopp, L., Boyd,  
1626 P.W., Galbraith, E.D., Geider, R.J., Guieu, C., Jaccard, S.L., Jickells,  
1627 T.D., Roche, J.L., Lenton, T.M., Mahowald, N.M., Marañón, E., Marinov,  
1628 I., Moore, J.K., Nakatsuka, T., Oschlies, A., Saito, M.A., Thingstad, T.F.,  
1629 Tsuda, A., Ulloa, O., 2013a. Processes and patterns of oceanic nutrient  
1630 limitation. *Nature Geoscience* 6, 701–710. doi:10.1038/ngeo1765.



- 1631 Moore, J.K., Doney, S.C., Kleypas, J.A., Glover, D.M., Fung, I.Y., 2001. An  
1632 intermediate complexity marine ecosystem model for the global domain.  
1633 *Deep Sea Research Part II: Topical Studies in Oceanography* 49, 403–462.
- 1634 Moore, J.K., Doney, S.C., Lindsay, K., 2004a. Upper ocean ecosystem dy-  
1635 namics and iron cycling in a global three-dimensional model. *Global Bio-*  
1636 *geochemical Cycles* 18.
- 1637 Moore, J.K., Doney, S.C., Lindsay, K., 2004b. Upper ocean ecosystem dy-  
1638 namics and iron cycling in a global three-dimensional model. *Global Bio-*  
1639 *geochemical Cycles* 18.
- 1640 Moore, J.K., Lindsay, K., Doney, S.C., Long, M.C., Misumi, K., 2013b.  
1641 Marine ecosystem dynamics and biogeochemical cycling in the community  
1642 earth system model [cesm1 (bgc)]: Comparison of the 1990s with the 2090s  
1643 under the rcp4. 5 and rcp8. 5 scenarios. *Journal of Climate* 26, 9291–9312.
- 1644 Moore, L.R., Chisholm, S.W., 1999. Photophysiology of the marine  
1645 cyanobacterium prochlorococcus: ecotypic differences among cultured iso-  
1646 lates. *Limnology and Oceanography* 44, 628–638.
- 1647 Moore, L.R., Post, A.F., Rocap, G., Chisholm, S.W., 2002. Utilization of  
1648 different nitrogen sources by the marine cyanobacteria prochlorococcus and  
1649 synechococcus. *Limnology and oceanography* 47, 989–996.
- 1650 Moriarty, R., O’Brien, T.D., 2013. Distribution of mesozooplankton biomass  
1651 in the global ocean. *Earth System Science Data* 5, 45–55. doi:10.5194/essd-  
1652 5-45-2013.
- 1653 Najjar, R., Orr, J., Sabine, C., Joos, F., 1999. Biotic-howto. Internal OCMIP  
1654 Report, LSCE/CEA Saclay, Gif-sur-Yvette, France 15.
- 1655 Nelson, D.M., Tréguer, P., Brzezinski, M.A., Leynaert, A., Quéguiner, B.,  
1656 1995. Production and dissolution of biogenic silica in the ocean: revised  
1657 global estimates, comparison with regional data and relationship to bio-  
1658 genic sedimentation. *Global Biogeochemical Cycles* 9, 359–372.
- 1659 O’Brien, T.D., 2005. Copepod, a global plankton database: a review of the  
1660 2005 database contents and creation of new global zooplankton biomass  
1661 fields .

- 1662 O'Neill, R., DeAngelis, D., Pastor, J., Jackson, B., Post, W., 1989. Multiple  
1663 nutrient limitations in ecological models. *Ecological Modelling* 46, 147–163.
- 1664 Oostende, N.V., Dussin, R., Stock, C.A., Barton, A.D., Curchitser, E.,  
1665 Dunne, J.P., Ward, B.B., 2018. Simulating the ocean's chlorophyll dy-  
1666 namic range from coastal upwelling to oligotrophy. *Progress in Oceanog-*  
1667 *raphy* 168, 232–247. doi:10.1016/j.pocean.2018.10.009.
- 1668 Park, J.Y., Stock, C.A., Dunne, J.P., Yang, X., Rosati, A., 2019. Seasonal  
1669 to multiannual marine ecosystem prediction with a global earth system  
1670 model. *Science* 365, 284–288.
- 1671 Peters, R.H., Wassenberg, K., 1983. The effect of body size on animal abun-  
1672 dance. *Oecologia* 60, 89–96.
- 1673 Pitt, K.A., Duarte, C.M., Lucas, C.H., Sutherland, K.R., Condon, R.H.,  
1674 Mianzan, H., Purcell, J.E., Robinson, K.L., Uye, S.I., 2013. Jellyfish body  
1675 plans provide allometric advantages beyond low carbon content. *PLoS*  
1676 *ONE* 8. doi:10.1371/journal.pone.0072683.
- 1677 Reynolds, C., 2006. *The Ecology of Phytoplankton*. Ecology, Bio-  
1678 diversity and Conservation, Cambridge University Press. URL:  
1679 <https://books.google.com/books?id=gDz5jGsPWZYC>.
- 1680 Richardson, K., Beardall, J., Raven, J.A., 1983. Adaptation of unicellular  
1681 algae to irradiance: an analysis of strategies. *New Phytologist* 93, 157–191.
- 1682 Ryther, J.H., 1969. Photosynthesis and fish production in the sea. *New*  
1683 *Series* 166, 72–76.
- 1684 Sarmiento, J.L., Slater, R., Barber, R., Bopp, L., Doney, S.C., Hirst, A.C.,  
1685 Kleypas, J., Matear, R., Mikolajewicz, U., Monfray, P., Soldatov, V., Spall,  
1686 S.A., Stouffer, R., 2004. Response of ocean ecosystems to climate warming.  
1687 *Global Biogeochemical Cycles* 18. doi:10.1029/2003GB002134.
- 1688 Sathyendranath, S., Stuart, V., Nair, A., Oka, K., Nakane, T., Bouman, H.,  
1689 Forget, M.H., Maass, H., Platt, T., 2009. Carbon-to-chlorophyll ratio and  
1690 growth rate of phytoplankton in the sea. *Marine Ecology Progress Series*  
1691 383, 73–84. doi:10.3354/meps07998.

- 1692 Schiebel, R., 2002. Planktic foraminiferal sedimentation and the marine  
1693 calcite budget. *Global Biogeochemical Cycles* 16, 3–1.
- 1694 Sheldon, R., Sutcliffe Jr, W., Paranjape, M., 1977. Structure of pelagic food  
1695 chain and relationship between plankton and fish production. *Journal of*  
1696 *the Fisheries Board of Canada* 34, 2344–2353.
- 1697 Six, K.D., Maier-Reimer, E., 1996. Effects of plankton dynamics on seasonal  
1698 carbon fluxes in an ocean general circulation model. *Global Biogeochemical*  
1699 *Cycles* 10, 559–583.
- 1700 Smith, R., Jones, P., Briegleb, B., Bryan, F., Danabasoglu, G., Dennis,  
1701 J., Dukowicz, J., Eden, C., Fox-Kemper, B., Gent, P., 2010. The parallel  
1702 ocean program (pop) reference manual ocean component of the community  
1703 climate system model (ccsm) and community earth system model (cesm).  
1704 LAUR-01853 141, 1–140.
- 1705 Spitz, Y., Moisan, J., Abbott, M., 2001. Configuring an ecosystem model  
1706 using data from the bermuda atlantic time series (bats). *Deep Sea Research*  
1707 *Part II: Topical Studies in Oceanography* 48, 1733–1768.
- 1708 Stawiarski, B., Buitenhuis, E.T., Quéré, C.L., 2016. The physiological re-  
1709 sponse of picophytoplankton to temperature and its model representation.  
1710 *Frontiers in Marine Science* 3. doi:10.3389/fmars.2016.00164.
- 1711 Steele, J.H., Henderson, E.W., 1992. The role of predation in plankton  
1712 models. *Journal of Plankton Research* 14, 157–172.
- 1713 Stefels, J., Dijkhuizen, L., Gieskes, W., 1995. Dmsp-lyase activity in a spring  
1714 phytoplankton bloom off the dutch coast, related to phaeocystis sp. abun-  
1715 dance. *Marine Ecology Progress Series* 123, 235–243.
- 1716 Steinberg, D.K., Carlson, C.A., Bates, N.R., Goldthwait, S.A., Madin, L.P.,  
1717 Michaels, A.F., 2000. Zooplankton vertical migration and the active trans-  
1718 port of dissolved organic and inorganic carbon in the sargasso sea. *Deep*  
1719 *Sea Research Part I: Oceanographic Research Papers* 47, 137–158.
- 1720 Steinberg, D.K., Carlson, C.A., Bates, N.R., Johnson, R.J., Michaels, A.F.,  
1721 Knap, A.H., 2001. Overview of the us jgofs bermuda atlantic time-series  
1722 study (bats): a decade-scale look at ocean biology and biogeochemistry.

- 1723 Deep Sea Research Part II: Topical Studies in Oceanography 48, 1405–  
1724 1447.
- 1725 Steinberg, D.K., Landry, M.R., 2017. Zooplankton and the ocean carbon  
1726 cycle. *Annual review of marine science* 9, 413–444.
- 1727 Stemmann, L., Boss, E., 2012. Plankton and particle size and packaging:  
1728 from determining optical properties to driving the biological pump. *Annual*  
1729 *Review of Marine Science* 4, 263–290.
- 1730 Stock, C., Dunne, J., 2010. Controls on the ratio of mesozooplank-  
1731 ton production to primary production in marine ecosystems. *Deep-*  
1732 *Sea Research Part I: Oceanographic Research Papers* 57, 95–112.  
1733 doi:10.1016/j.dsr.2009.10.006.
- 1734 Stock, C., Dunne, J., John, J., 2014a. Drivers of trophic amplification of  
1735 ocean productivity trends in a changing climate. *Biogeosciences* 11, 7125–  
1736 7135.
- 1737 Stock, C.A., Dunne, J.P., Fan, S., Ginoux, P., John, J., Krasting, J.P.,  
1738 Laufkötter, C., Paulot, F., Zadeh, N., 2020. Ocean biogeochemistry  
1739 in gfdl’s earth system model 4.1 and its response to increasing at-  
1740 mospheric co2. *Journal of Advances in Modeling Earth Systems* 12.  
1741 doi:10.1029/2019MS002043.
- 1742 Stock, C.A., Dunne, J.P., John, J.G., 2014b. Global-scale carbon and en-  
1743 ergy flows through the marine planktonic food web: An analysis with a  
1744 coupled physical-biological model. *Progress in Oceanography* 120, 1–28.  
1745 doi:10.1016/j.pocean.2013.07.001.
- 1746 Straile, D., 1997. Gross growth efficiencies of protozoan and metazoan  
1747 zooplankton and their dependence on food concentration, predator-prey  
1748 weight ratio, and taxonomic group. *Limnology and Oceanography* 42,  
1749 1375–1385.
- 1750 Tang, E.P.Y., 1995. The allometry of algal growth and respiration .
- 1751 Tang, W., Wang, S., Fonseca-Batista, D., Dehairs, F., Gifford, S., Gon-  
1752 zalez, A.G., Gallinari, M., Planquette, H., Sarthou, G., Cassar, N.,

- 1753 2019. Revisiting the distribution of oceanic n<sub>2</sub> fixation and estimat-  
1754 ing diazotrophic contribution to marine production. *Nature Communi-*  
1755 *cations* 10, 831. URL: <https://doi.org/10.1038/s41467-019-08640-0>,  
1756 doi:10.1038/s41467-019-08640-0.
- 1757 Taniguchi, D.A., Franks, P.J., Poulin, F.J., 2014. Planktonic biomass size  
1758 spectra: An emergent property of size-dependent physiological rates, food  
1759 web dynamics, and nutrient regimes. *Marine Ecology Progress Series* 514,  
1760 13–33. doi:10.3354/meps10968.
- 1761 Tréguer, P., Bowler, C., Moriceau, B., Dutkiewicz, S., Gehlen, M., Aumont,  
1762 O., Bittner, L., Dugdale, R., Finkel, Z., Iudicone, D., Jahn, O., Guidi,  
1763 L., Lasbleiz, M., Leblanc, K., Levy, M., Pondaven, P., 2018. Influence of  
1764 diatom diversity on the ocean biological carbon pump. *Nature Geoscience*  
1765 11, 27–37. doi:10.1038/s41561-017-0028-x.
- 1766 Vallina, S.M., Follows, M., Dutkiewicz, S., Montoya, J.M., Cermenó, P.,  
1767 Loreau, M., 2014. Global relationship between phytoplankton diversity  
1768 and productivity in the ocean. *Nature communications* 5, 1–10.
- 1769 Wang, W.L., Moore, J.K., Martiny, A.C., Primeau, F.W., 2019. Convergent  
1770 estimates of marine nitrogen fixation. *Nature* 566, 205–211.
- 1771 Ward, B.A., Dutkiewicz, S., Follows, M.J., 2014. Modelling spatial and  
1772 temporal patterns in size-structured marine plankton communities: top–  
1773 down and bottom–up controls. *Journal of Plankton Research* 36, 31–47.
- 1774 Ward, B.A., Dutkiewicz, S., Jahn, O., Follows, M.J., 2012. A size-structured  
1775 food-web model for the global ocean. *Limnology and Oceanography* 57,  
1776 1877–1891. doi:10.4319/lo.2012.57.6.1877.
- 1777 Ward, B.A., Follows, M.J., 2016. Marine mixotrophy increases trophic trans-  
1778 fer efficiency, mean organism size, and vertical carbon flux. *Proceedings of*  
1779 *the National Academy of Sciences* 113, 2958–2963.
- 1780 Wu, J., Sunda, W., Boyle, E.A., Karl, D.M., 2000. Phosphate depletion in  
1781 the western north atlantic ocean. *Science* 289, 759–762.
- 1782 Yool, A., Popova, E., Anderson, T., 2013. Medusa-2.0: an intermediate  
1783 complexity biogeochemical model of the marine carbon cycle for climate

- 1784 change and ocean acidification studies. *Geoscientific Model Development*  
1785 6, 1767–1811.
- 1786 Yuan, L.L., Pollard, A.I., 2018. Changes in the relationship between zoo-  
1787 plankton and phytoplankton biomasses across a eutrophication gradient.  
1788 *Limnology and oceanography* 63, 2493–2507.
